# Supplementary material
Source: PubMed Central journal article supplement (PMC8602936)
Supplement: bloodBLD2021011405-suppl1.pdf [file bloodBLD2021011405-suppl1.pdf]

**KIN-8194**

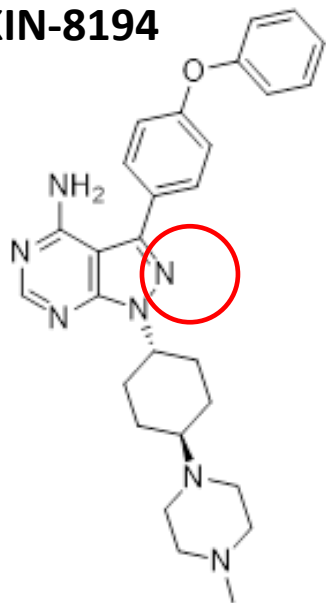

**A419259/RK-20449**

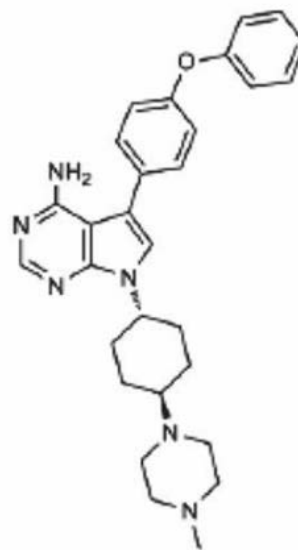

**Supplemental Figure 1.** Comparison of KIN-8194 and A419259 (RK20449) Chemical Structures.

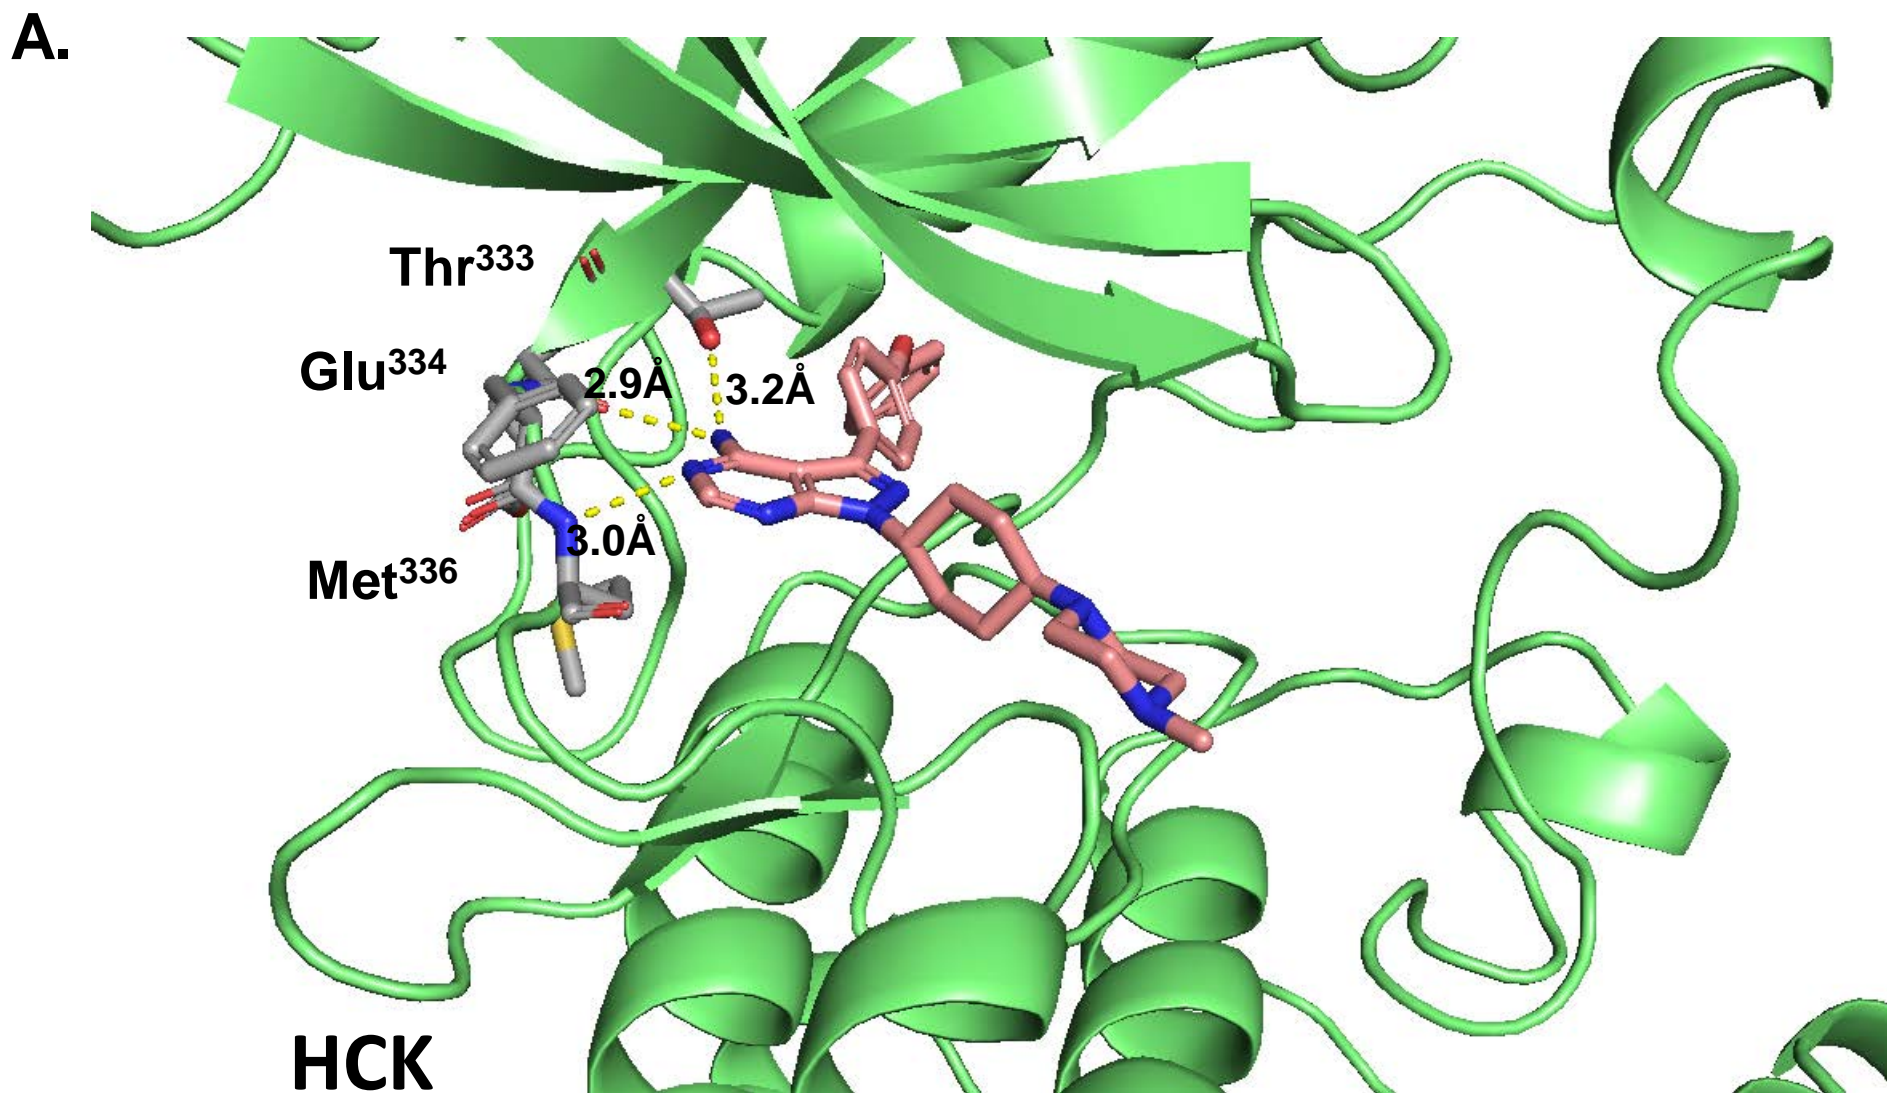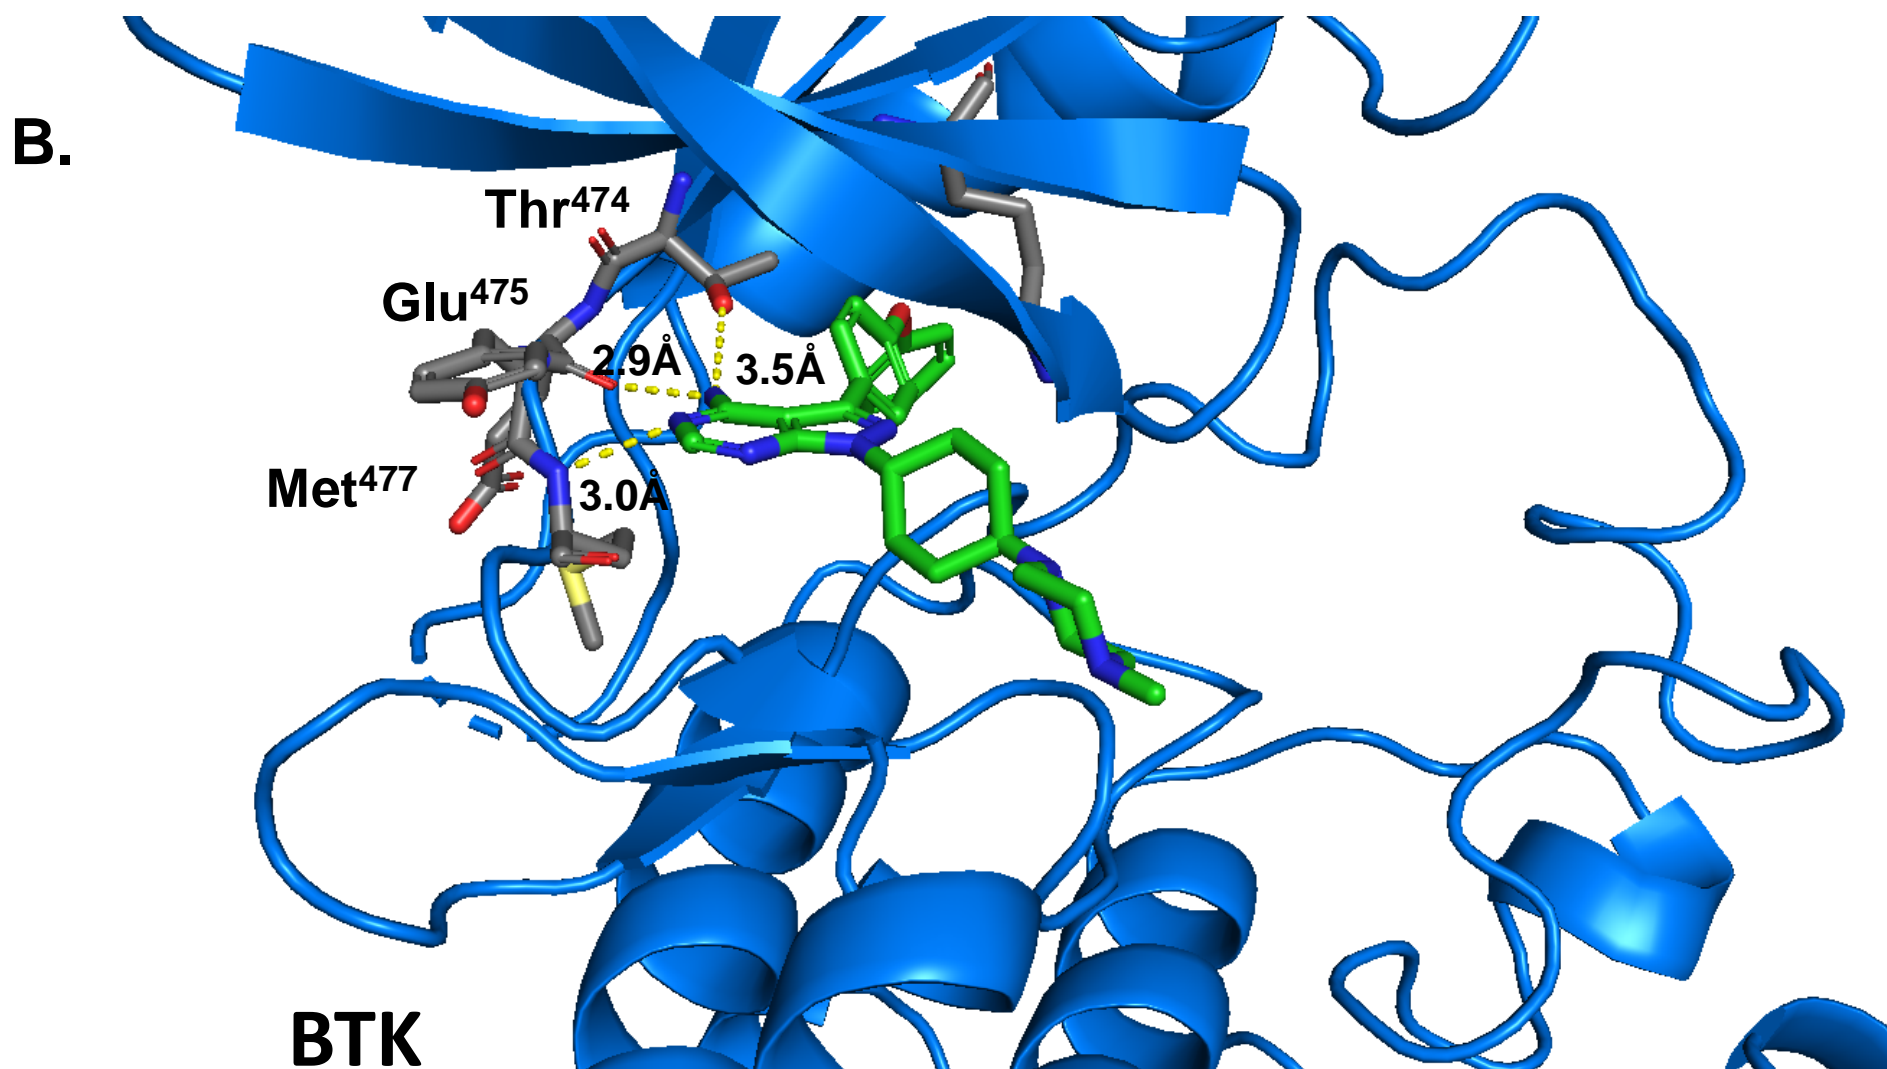

**Supplementary Figure 2.** Docking study of KIN-8194 into the co-crystal structure of (A) HCK with A419259 (pdb:5zj6) and (B) BTK with Ibrutinib

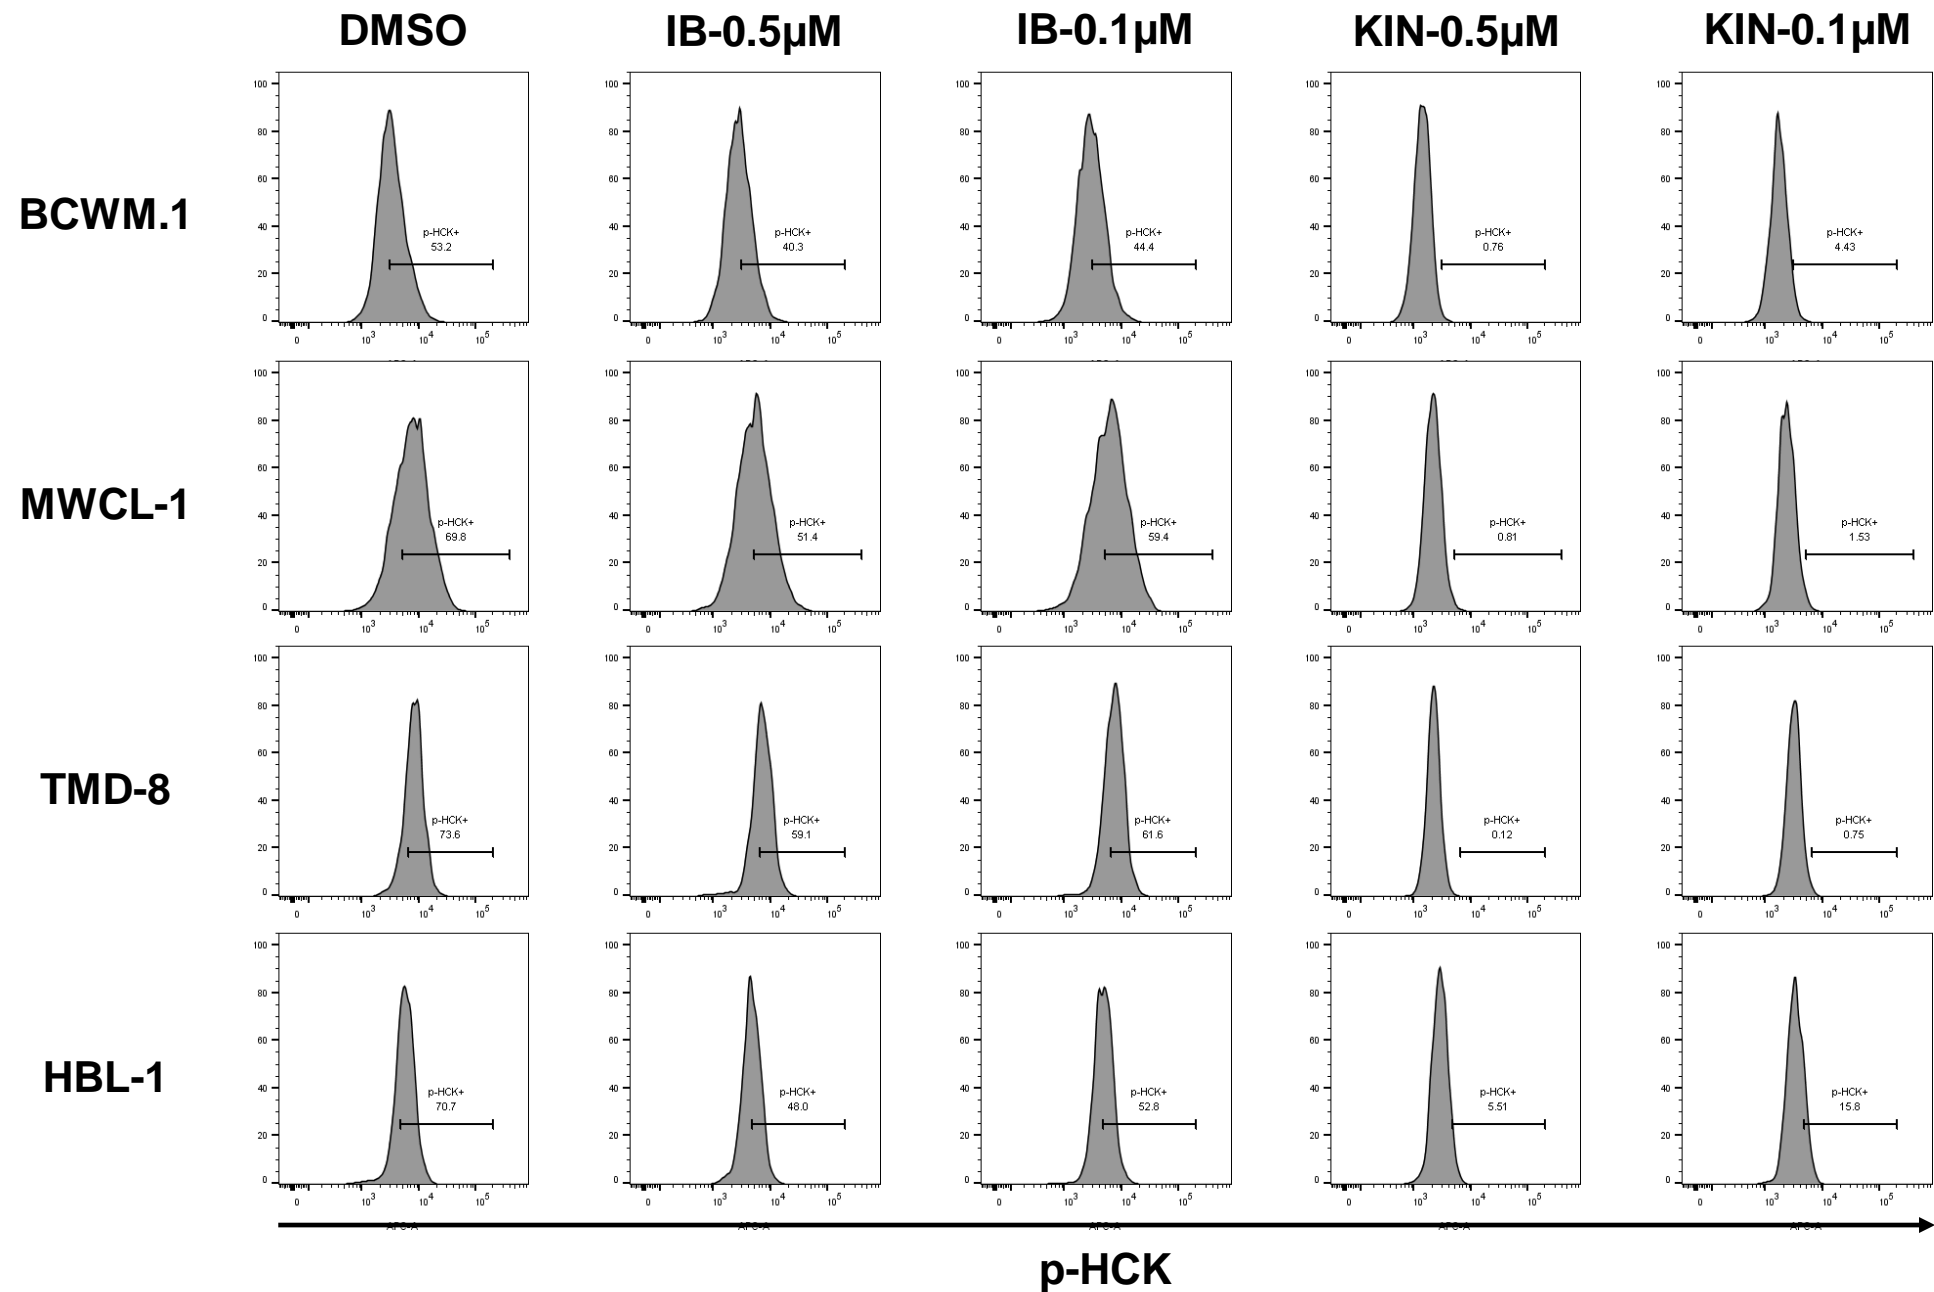

**Supplementary Figure 3.** Changes in HCK activation by flow cytometry following treatment with either ibuprofen (IB) or KIN 8104 (KIN) in MYD88-mutated lymphoma cell lines at

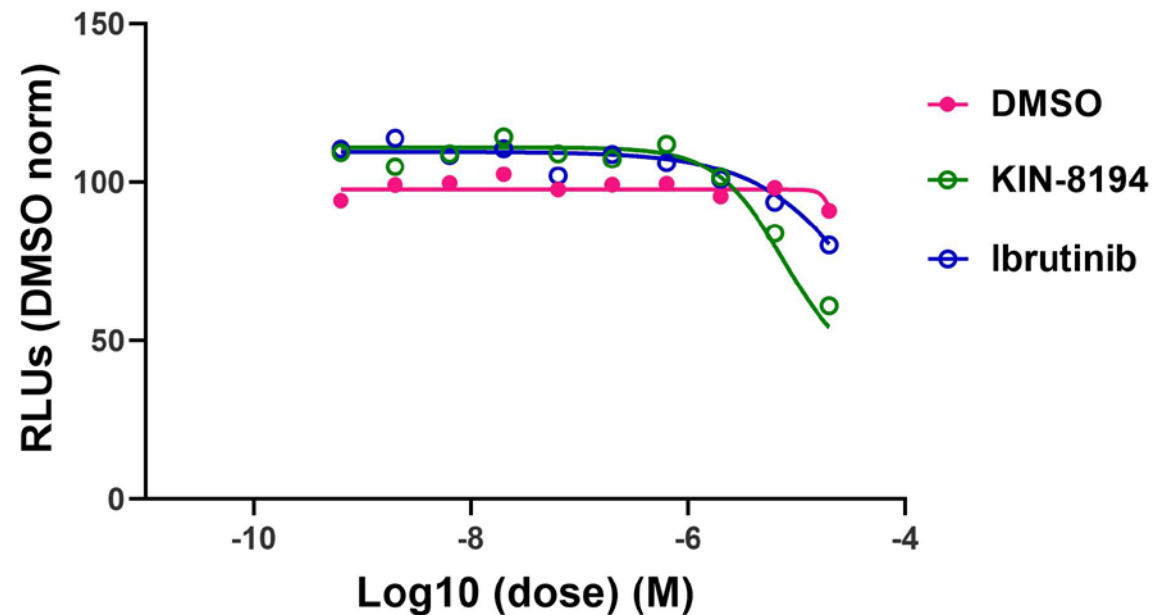

**Supplementary Figure 4.** Comparative dose-response curves for ibrutinib and KIN-8194 in MYD88 and CARD11 mutated OCI-Ly3 ABC DLBCL cells. Experiment was performed in triplicate, and representative experiment is shown.

# A419259

## Microsome stability

| Species | $t_{1/2}$ (min) |
|---------|-----------------|
| Mouse   | 76.8            |
| Rat     | 69.9            |
| Human   | 33.6            |

## Plasma protein binding

| Species | %     |
|---------|-------|
| Mouse   | 99.8% |
| Rat     | 99.7% |
| Dog     | 99.2% |
| Human   | 99.8% |

## PK parameters

$t_{1/2}$  = 5.7 h  
 Cl = 10.78 mL/min/kg  
 Vss = 4.9 L/kg  
 $t_{1/2}$  = 176.0 h  
 AUC = 13.0  $\mu\text{M}\cdot\text{h}$   
 F = 65.5 %

## Mouse pharmacokinetics

i.v.: 2 mg/kg, 0.2 mg/mL A419259•3HCl in saline  
 p.o.: 10mg/kg, 1 mg/mL A419259•3HCl in saline

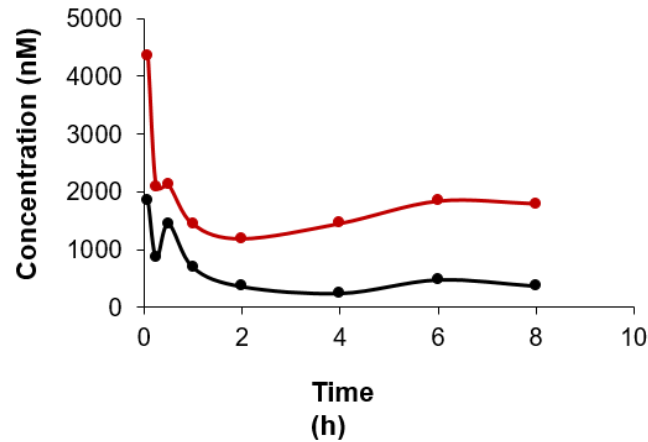

## Microsome stability

| Species | $t_{1/2}$ (min) |
|---------|-----------------|
| Mouse   | 106.4           |
| Rat     | >120            |
| Human   | 49.5            |

## Plasma protein binding

| Species | %    |
|---------|------|
| Mouse   | 97.7 |
| Rat     | 95.5 |
| Dog     | 95.0 |
| Human   | 95.7 |

## PK parameters

$t_{1/2}$  = 11.5 h  
 Cl = 17.4 mL/min/kg  
 Vss = 14.8 L/kg  
 $t_{1/2}$  = 15.1 h  
 AUC = 5.2  $\mu\text{M}\cdot\text{h}$   
 F = 55%  
 $t_{1/2}$  = 16.9 h  
 AUC = 11.4  $\mu\text{M}\cdot\text{h}$   
 F = 49%

# KIN-8194

## Mouse pharmacokinetics

i.v.: 2 mg/kg, 0.2 mg/mL Compound (I) • 3 HCl in Saline  
 i.v.: 10 mg/kg, 1 mg/mL Compound (I) • 3 HCl in Saline  
 i.v.: 25 mg/kg, 2.5 mg/mL Compound (I) • 3 HCl in Saline

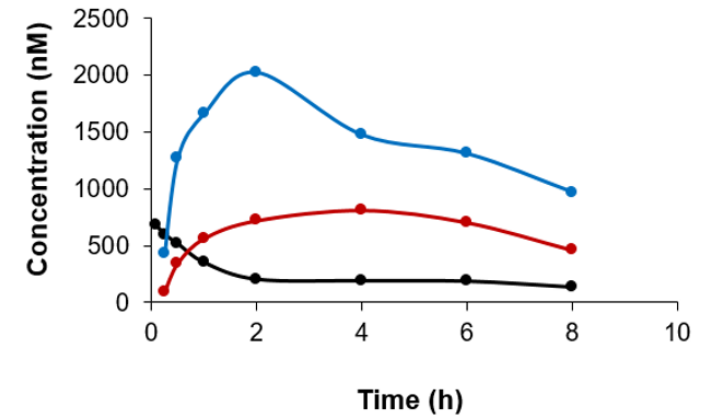

**Supplementary Figure 5.** Comparison of A419259 and KIN-8194 microsomal stability, protein binding, and pharmacokinetics. Arrows denote key differences in compound parameters.

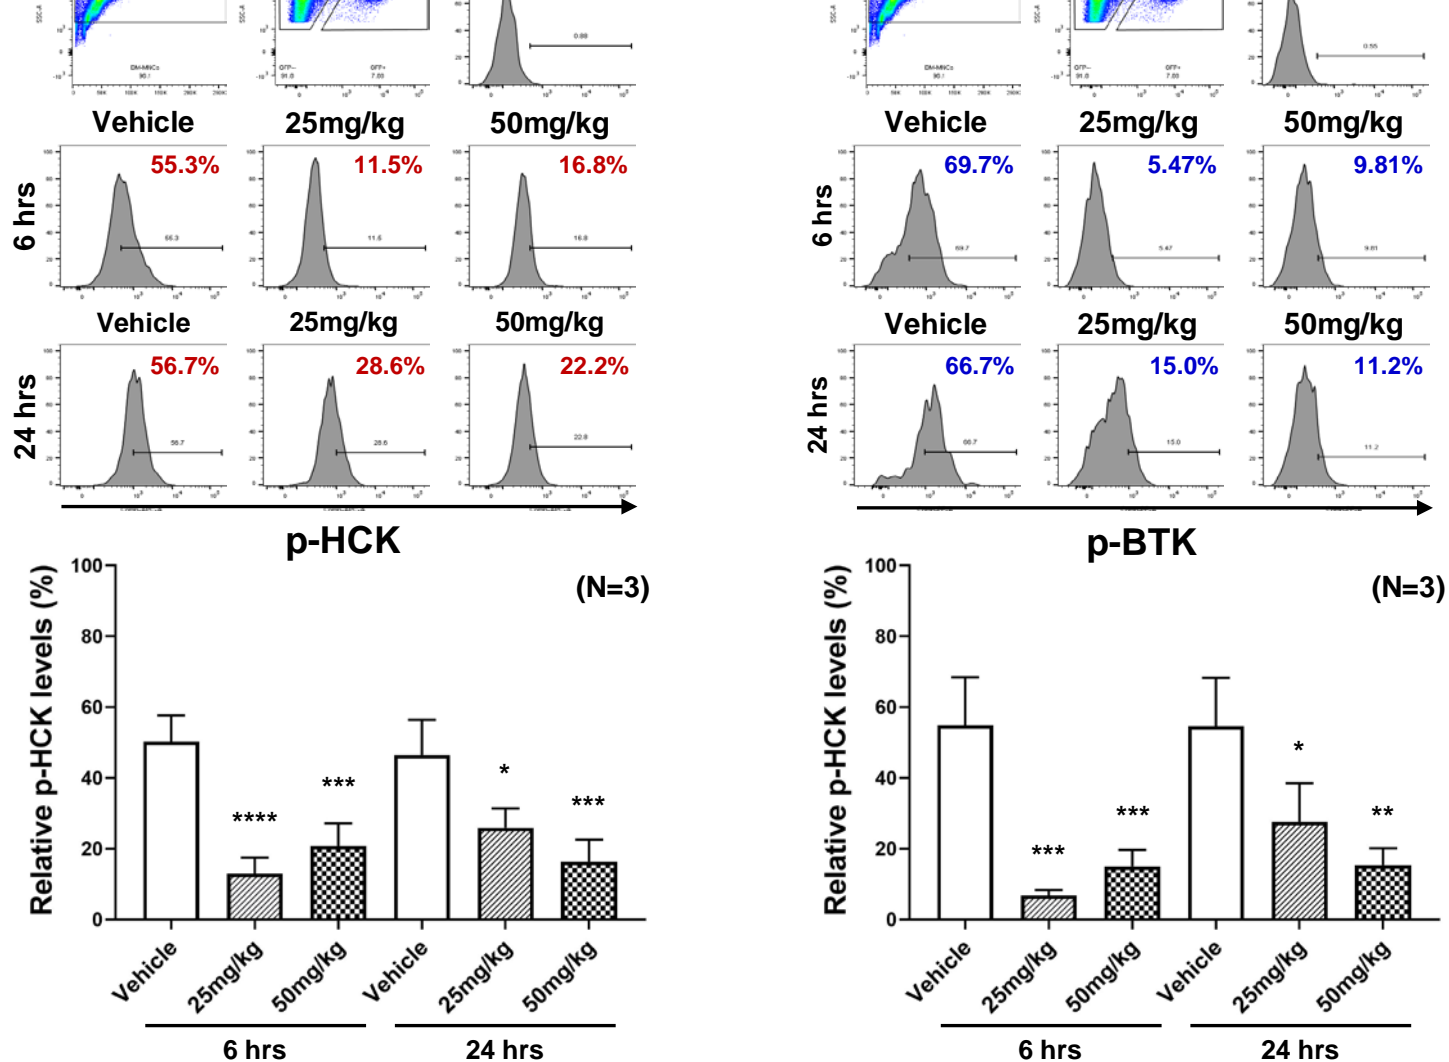

**Supplemental Figure 6.** Pharmacodynamic studies of KIN-8194 in ibritinib sensitive BTK<sup>WT</sup> expressing BCWM.1 WM xenografted mice. Pharmacodynamic study showing changes in the activity of p-HCK<sup>Y410</sup> and BTK<sup>Y223</sup> following oral administration of KIN-8194 in NOD-SCID mice xenografted with ibritinib sensitive BTK<sup>WT</sup> BCWM.1 WM cells by intravenous injection. PhosFlow plots for p-HCK<sup>Y410</sup> (A) and p-BTK<sup>Y223</sup> (B) are shown of GFP<sup>+</sup> gated BCWM.1 tumor cells obtained from mononuclear cells of mouse femurs at 6 and 24 hours following oral administration of KIN-8194 at the indicated doses (n=3 per group). \*p<0.05; \*\*p<0.01; \*\*\*p<0.005; \*\*\*\*p<0.0001.

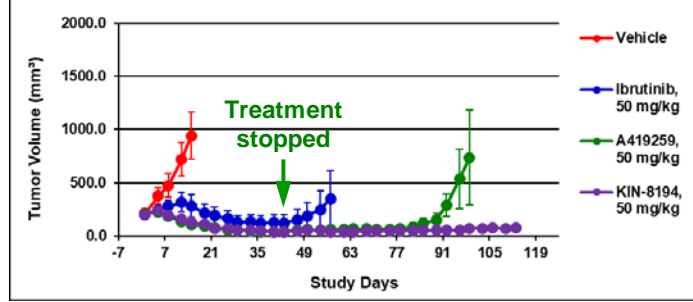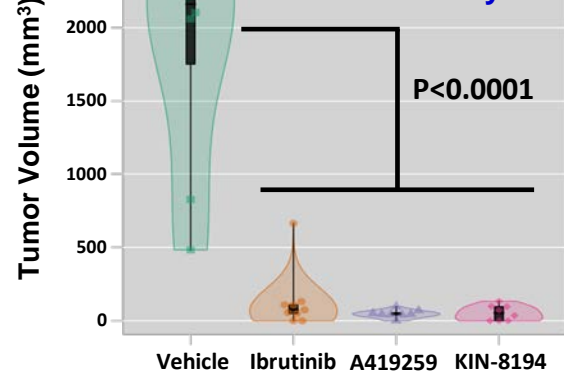

C.

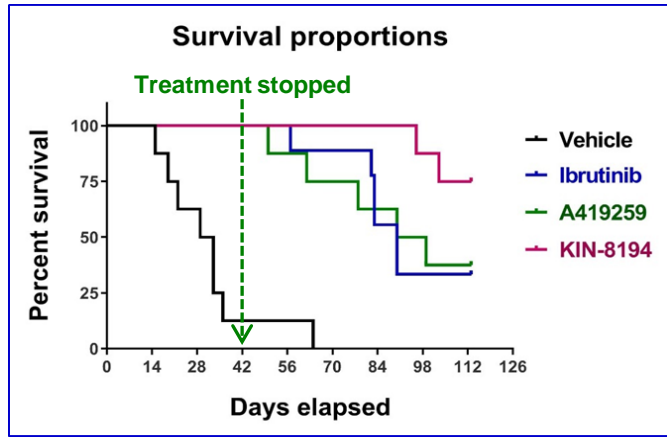

|                        | Vehicle | Ibrutinib 50mg/kg | A419259 50mg/kg | KIN-8194 50mg/kg |
|------------------------|---------|-------------------|-----------------|------------------|
| Median Survival (days) | 31      | 90                | 94.5            | Undefined        |

Log-rank (Mantel-Cox) test, P<0.0001

**Supplementary Figure 7.** Efficacy studies of KIN-8194 and A419259 (RK20449) in ibrutinib sensitive BTK<sup>WT</sup> TMD-8 ABC DLBCL xenografted mice. (C) Efficacy studies in NOD-SCID mice (n=8 per cohort) bearing ibrutinib sensitive BTK<sup>WT</sup> TMD-8 cells following daily oral administration of vehicle control, ibrutinib, A419259 or KIN-8194 at 50mg/kg. Tumor volume (mm<sup>3</sup>) was measured twice weekly and reported as the mean volume ± SEM. Treatment was stopped (indicated by green arrow) at day 42 and tumor volumes were monitored until day 113. (D) Tumor volume comparisons at day 33 n-values for cohort comparisons are shown. (E) Survival

# A419259

# KIN-8194

| Compound Name | DiscoverX Gene Symbol         | Entrez Gene Symbol | Percent Control | Compound Name | DiscoverX Gene Symbol         | Entrez Gene Symbol | Percent Control |
|---------------|-------------------------------|--------------------|-----------------|---------------|-------------------------------|--------------------|-----------------|
| A419259       | ABL1(F317I)-nonphosphorylated | ABL1               | 0               | KIN-8194      | ERBB2                         | ERBB2              | 0               |
| A419259       | ABL1(F317L)-nonphosphorylated | ABL1               | 0               | KIN-8194      | ERBB3                         | ERBB3              | 0               |
| A419259       | ABL1(Q252H)-nonphosphorylated | ABL1               | 0               | KIN-8194      | LATS2                         | LATS2              | 0               |
| A419259       | ABL1-nonphosphorylated        | ABL1               | 0               | KIN-8194      | PFCDPK1(P.falciparum)         | CDPK1              | 0               |
| A419259       | ERBB2                         | ERBB2              | 0               | KIN-8194      | SRMS                          | SRMS               | 0               |
| A419259       | ERBB3                         | ERBB3              | 0               | KIN-8194      | BLK                           | BLK                | 0.05            |
| A419259       | PDGFRB                        | PDGFRB             | 0               | KIN-8194      | BTK                           | BTK                | 0.15            |
| A419259       | CSK                           | CSK                | 0.05            | KIN-8194      | MEK5                          | MAP2K5             | 0.2             |
| A419259       | HCK                           | HCK                | 0.05            | KIN-8194      | SRC                           | SRC                | 0.2             |
| A419259       | MEK5                          | MAP2K5             | 0.05            | KIN-8194      | FYN                           | FYN                | 0.25            |
| A419259       | PFCDPK1(P.falciparum)         | CDPK1              | 0.05            | KIN-8194      | YES                           | YES1               | 0.3             |
| A419259       | SRMS                          | SRMS               | 0.05            | KIN-8194      | CSK                           | CSK                | 0.4             |
| A419259       | BLK                           | BLK                | 0.1             | KIN-8194      | LCK                           | LCK                | 0.45            |
| A419259       | SRC                           | SRC                | 0.1             | KIN-8194      | ABL1-nonphosphorylated        | ABL1               | 0.55            |
| A419259       | FLT3(K663Q)                   | FLT3               | 0.15            | KIN-8194      | HCK                           | HCK                | 0.65            |
| A419259       | KIT(L576P)                    | KIT                | 0.15            | KIN-8194      | EGFR(T790M)                   | EGFR               | 0.7             |
| A419259       | ABL1(H396P)-nonphosphorylated | ABL1               | 0.2             | KIN-8194      | EGFR                          | EGFR               | 0.95            |
| A419259       | FYN                           | FYN                | 0.2             | KIN-8194      | FRK                           | FRK                | 0.95            |
| A419259       | YES                           | YES1               | 0.2             | KIN-8194      | ABL1(F317I)-nonphosphorylated | ABL1               | 1.1             |
| A419259       | FLT3(D835V)                   | FLT3               | 0.25            | KIN-8194      | ABL1(H396P)-nonphosphorylated | ABL1               | 1.2             |
| A419259       | BTK                           | BTK                | 0.35            | KIN-8194      | ABL1(F317L)-nonphosphorylated | ABL1               | 1.4             |
| A419259       | EGFR                          | EGFR               | 0.45            | KIN-8194      | BRK                           | PTK6               | 1.5             |
| A419259       | LCK                           | LCK                | 0.55            | KIN-8194      | FGR                           | FGR                | 1.5             |
| A419259       | FRK                           | FRK                | 0.65            | KIN-8194      | PDGFRB                        | PDGFRB             | 1.6             |
| A419259       | BRK                           | PTK6               | 0.85            | KIN-8194      | FLT3(D835V)                   | FLT3               | 3.5             |
| A419259       | EGFR(T790M)                   | EGFR               | 0.9             | KIN-8194      | ABL1(Q252H)-nonphosphorylated | ABL1               | 4.1             |
| A419259       | ERBB4                         | ERBB4              | 1.3             | KIN-8194      | ERBB4                         | ERBB4              | 4.5             |
| A419259       | FGR                           | FGR                | 1.3             | KIN-8194      | CSNK1E                        | CSNK1E             | 4.7             |
| A419259       | FLT3                          | FLT3               | 2.6             | KIN-8194      | LYN                           | LYN                | 5.2             |
| A419259       | KIT(V559D)                    | KIT                | 2.6             | KIN-8194      | RIPK2                         | RIPK2              | 5.7             |
| A419259       | RET                           | RET                | 2.6             | KIN-8194      | MEK1                          | MAP2K1             | 6.6             |
| A419259       | MEK1                          | MAP2K1             | 2.7             | KIN-8194      | MEK2                          | MAP2K2             | 6.9             |
| A419259       | FLT3(N841I)                   | FLT3               | 3.1             | KIN-8194      | TNK2                          | TNK2               | 8               |
| A419259       | RIPK2                         | RIPK2              | 3.2             | KIN-8194      | EGFR(L861Q)                   | EGFR               | 8.5             |
| A419259       | FLT3(R834Q)                   | FLT3               | 3.5             |               |                               |                    |                 |
| A419259       | EPHB6                         | EPHB6              | 3.9             |               |                               |                    |                 |
| A419259       | CSNK1E                        | CSNK1E             | 4.2             |               |                               |                    |                 |
| A419259       | MEK2                          | MAP2K2             | 4.8             |               |                               |                    |                 |
| A419259       | TNK2                          | TNK2               | 5.2             |               |                               |                    |                 |
| A419259       | EGFR(L861Q)                   | EGFR               | 5.4             |               |                               |                    |                 |
| A419259       | PDGFRA                        | PDGFRA             | 6.1             |               |                               |                    |                 |
| A419259       | LYN                           | LYN                | 6.6             |               |                               |                    |                 |
| A419259       | RET(M918T)                    | RET                | 6.7             |               |                               |                    |                 |
| A419259       | EGFR(G719C)                   | EGFR               | 8.2             |               |                               |                    |                 |
| A419259       | KIT                           | KIT                | 8.7             |               |                               |                    |                 |
| A419259       | ABL1(Q252H)-phosphorylated    | ABL1               | 9.3             |               |                               |                    |                 |
| A419259       | ABL1(F317L)-phosphorylated    | ABL1               | 9.8             |               |                               |                    |                 |

**Supplementary Table 4.** Comparison of KIN-8194 vs. A419259 (RK-20449) kinase inhibition ( $\geq 90\%$ ) by KINOMEScan at 100 nM.



Supplementary Table 1

| Compound Name | DiscoverX Gene Symbol         | Entrez Gene Symbol | Percent Control | Compound Concentration (nM) |
|---------------|-------------------------------|--------------------|-----------------|-----------------------------|
| KIN-8194      | AAK1                          | AAK1               | 90              | 1000                        |
| KIN-8194      | ABL1(E255K)-phosphorylated    | ABL1               | 1               | 1000                        |
| KIN-8194      | ABL1(F317I)-nonphosphorylated | ABL1               | 2.5             | 1000                        |
| KIN-8194      | ABL1(F317I)-phosphorylated    | ABL1               | 8               | 1000                        |
| KIN-8194      | ABL1(F317L)-nonphosphorylated | ABL1               | 11              | 1000                        |
| KIN-8194      | ABL1(F317L)-phosphorylated    | ABL1               | 2.9             | 1000                        |
| KIN-8194      | ABL1(H396P)-nonphosphorylated | ABL1               | 1.2             | 1000                        |
| KIN-8194      | ABL1(H396P)-phosphorylated    | ABL1               | 2.3             | 1000                        |
| KIN-8194      | ABL1(M351T)-phosphorylated    | ABL1               | 4.3             | 1000                        |
| KIN-8194      | ABL1(Q252H)-nonphosphorylated | ABL1               | 2.9             | 1000                        |
| KIN-8194      | ABL1(Q252H)-phosphorylated    | ABL1               | 2               | 1000                        |
| KIN-8194      | ABL1(T315I)-nonphosphorylated | ABL1               | 56              | 1000                        |
| KIN-8194      | ABL1(T315I)-phosphorylated    | ABL1               | 65              | 1000                        |
| KIN-8194      | ABL1(Y253F)-phosphorylated    | ABL1               | 1               | 1000                        |
| KIN-8194      | ABL1-nonphosphorylated        | ABL1               | 0.3             | 1000                        |
| KIN-8194      | ABL1-phosphorylated           | ABL1               | 0.7             | 1000                        |
| KIN-8194      | ABL2                          | ABL2               | 5               | 1000                        |
| KIN-8194      | ACVR1                         | ACVR1              | 98              | 1000                        |
| KIN-8194      | ACVR1B                        | ACVR1B             | 100             | 1000                        |
| KIN-8194      | ACVR2A                        | ACVR2A             | 100             | 1000                        |
| KIN-8194      | ACVR2B                        | ACVR2B             | 95              | 1000                        |
| KIN-8194      | ACVRL1                        | ACVRL1             | 60              | 1000                        |
| KIN-8194      | ADCK3                         | CABC1              | 92              | 1000                        |
| KIN-8194      | ADCK4                         | ADCK4              | 96              | 1000                        |
| KIN-8194      | AKT1                          | AKT1               | 94              | 1000                        |
| KIN-8194      | AKT2                          | AKT2               | 65              | 1000                        |
| KIN-8194      | AKT3                          | AKT3               | 83              | 1000                        |
| KIN-8194      | ALK                           | ALK                | 48              | 1000                        |
| KIN-8194      | ALK(C1156Y)                   | ALK                | 36              | 1000                        |
| KIN-8194      | ALK(L1196M)                   | ALK                | 65              | 1000                        |
| KIN-8194      | AMPK-alpha1                   | PRKAA1             | 34              | 1000                        |
| KIN-8194      | AMPK-alpha2                   | PRKAA2             | 50              | 1000                        |
| KIN-8194      | ANKK1                         | ANKK1              | 49              | 1000                        |
| KIN-8194      | ARK5                          | NUAK1              | 64              | 1000                        |
| KIN-8194      | ASK1                          | MAP3K5             | 79              | 1000                        |
| KIN-8194      | ASK2                          | MAP3K6             | 77              | 1000                        |
| KIN-8194      | AURKA                         | AURKA              | 4.8             | 1000                        |
| KIN-8194      | AURKB                         | AURKB              | 94              | 1000                        |
| KIN-8194      | AURKC                         | AURKC              | 79              | 1000                        |
| KIN-8194      | AXL                           | AXL                | 23              | 1000                        |
| KIN-8194      | BIKE                          | BMP2K              | 84              | 1000                        |
| KIN-8194      | BLK                           | BLK                | 0.1             | 1000                        |
| KIN-8194      | BMPR1A                        | BMPR1A             | 100             | 1000                        |
| KIN-8194      | BMPR1B                        | BMPR1B             | 85              | 1000                        |
| KIN-8194      | BMPR2                         | BMPR2              | 100             | 1000                        |
| KIN-8194      | BMX                           | BMX                | 0.3             | 1000                        |
| KIN-8194      | BRAF                          | BRAF               | 32              | 1000                        |
| KIN-8194      | BRAF(V600E)                   | BRAF               | 18              | 1000                        |
| KIN-8194      | BRK                           | PTK6               | 0.05            | 1000                        |
| KIN-8194      | BRSK1                         | BRSK1              | 64              | 1000                        |
| KIN-8194      | BRSK2                         | BRSK2              | 35              | 1000                        |
| KIN-8194      | BTK                           | BTK                | 0               | 1000                        |
| KIN-8194      | BUB1                          | BUB1               | 91              | 1000                        |

|          |                     |          |     |      |
|----------|---------------------|----------|-----|------|
| KIN-8194 | CAMK1               | CAMK1    | 48  | 1000 |
| KIN-8194 | CAMK1B              | PNCK     | 80  | 1000 |
| KIN-8194 | CAMK1D              | CAMK1D   | 58  | 1000 |
| KIN-8194 | CAMK1G              | CAMK1G   | 77  | 1000 |
| KIN-8194 | CAMK2A              | CAMK2A   | 83  | 1000 |
| KIN-8194 | CAMK2B              | CAMK2B   | 84  | 1000 |
| KIN-8194 | CAMK2D              | CAMK2D   | 97  | 1000 |
| KIN-8194 | CAMK2G              | CAMK2G   | 100 | 1000 |
| KIN-8194 | CAMK4               | CAMK4    | 47  | 1000 |
| KIN-8194 | CAMKK1              | CAMKK1   | 87  | 1000 |
| KIN-8194 | CAMKK2              | CAMKK2   | 70  | 1000 |
| KIN-8194 | CASK                | CASK     | 95  | 1000 |
| KIN-8194 | CDC2L1              | CDK11B   | 72  | 1000 |
| KIN-8194 | CDC2L2              | CDC2L2   | 70  | 1000 |
| KIN-8194 | CDC2L5              | CDK13    | 98  | 1000 |
| KIN-8194 | CDK11               | CDK19    | 4.5 | 1000 |
| KIN-8194 | CDK2                | CDK2     | 97  | 1000 |
| KIN-8194 | CDK3                | CDK3     | 100 | 1000 |
| KIN-8194 | CDK4                | CDK4     | 98  | 1000 |
| KIN-8194 | CDK4-cyclinD1       | CDK4     | 29  | 1000 |
| KIN-8194 | CDK4-cyclinD3       | CDK4     | 79  | 1000 |
| KIN-8194 | CDK5                | CDK5     | 92  | 1000 |
| KIN-8194 | CDK7                | CDK7     | 53  | 1000 |
| KIN-8194 | CDK8                | CDK8     | 14  | 1000 |
| KIN-8194 | CDK9                | CDK9     | 86  | 1000 |
| KIN-8194 | CDKL1               | CDKL1    | 78  | 1000 |
| KIN-8194 | CDKL2               | CDKL2    | 99  | 1000 |
| KIN-8194 | CDKL3               | CDKL3    | 100 | 1000 |
| KIN-8194 | CDKL5               | CDKL5    | 60  | 1000 |
| KIN-8194 | CHEK1               | CHEK1    | 91  | 1000 |
| KIN-8194 | CHEK2               | CHEK2    | 28  | 1000 |
| KIN-8194 | CIT                 | CIT      | 75  | 1000 |
| KIN-8194 | CLK1                | CLK1     | 98  | 1000 |
| KIN-8194 | CLK2                | CLK2     | 71  | 1000 |
| KIN-8194 | CLK3                | CLK3     | 84  | 1000 |
| KIN-8194 | CLK4                | CLK4     | 97  | 1000 |
| KIN-8194 | CSF1R               | CSF1R    | 31  | 1000 |
| KIN-8194 | CSF1R-autoinhibited | CSF1R    | 100 | 1000 |
| KIN-8194 | CSK                 | CSK      | 1   | 1000 |
| KIN-8194 | CSNK1A1             | CSNK1A1  | 50  | 1000 |
| KIN-8194 | CSNK1A1L            | CSNK1A1L | 92  | 1000 |
| KIN-8194 | CSNK1D              | CSNK1D   | 36  | 1000 |
| KIN-8194 | CSNK1E              | CSNK1E   | 1.2 | 1000 |
| KIN-8194 | CSNK1G1             | CSNK1G1  | 95  | 1000 |
| KIN-8194 | CSNK1G2             | CSNK1G2  | 100 | 1000 |
| KIN-8194 | CSNK1G3             | CSNK1G3  | 100 | 1000 |
| KIN-8194 | CSNK2A1             | CSNK2A1  | 76  | 1000 |
| KIN-8194 | CSNK2A2             | CSNK2A2  | 15  | 1000 |
| KIN-8194 | CTK                 | MATK     | 26  | 1000 |
| KIN-8194 | DAPK1               | DAPK1    | 73  | 1000 |
| KIN-8194 | DAPK2               | DAPK2    | 81  | 1000 |
| KIN-8194 | DAPK3               | DAPK3    | 76  | 1000 |
| KIN-8194 | DCAMKL1             | DCLK1    | 57  | 1000 |
| KIN-8194 | DCAMKL2             | DCLK2    | 77  | 1000 |

|          |                           |          |      |      |
|----------|---------------------------|----------|------|------|
| KIN-8194 | DCAMKL3                   | DCLK3    | 63   | 1000 |
| KIN-8194 | DDR1                      | DDR1     | 24   | 1000 |
| KIN-8194 | DDR2                      | DDR2     | 63   | 1000 |
| KIN-8194 | DLK                       | MAP3K12  | 58   | 1000 |
| KIN-8194 | DMPK                      | DMPK     | 94   | 1000 |
| KIN-8194 | DMPK2                     | CDC42BPG | 4    | 1000 |
| KIN-8194 | DRAK1                     | STK17A   | 91   | 1000 |
| KIN-8194 | DRAK2                     | STK17B   | 82   | 1000 |
| KIN-8194 | DYRK1A                    | DYRK1A   | 66   | 1000 |
| KIN-8194 | DYRK1B                    | DYRK1B   | 100  | 1000 |
| KIN-8194 | DYRK2                     | DYRK2    | 83   | 1000 |
| KIN-8194 | EGFR                      | EGFR     | 0    | 1000 |
| KIN-8194 | EGFR(E746-A750del)        | EGFR     | 71   | 1000 |
| KIN-8194 | EGFR(G719C)               | EGFR     | 1.8  | 1000 |
| KIN-8194 | EGFR(G719S)               | EGFR     | 1.9  | 1000 |
| KIN-8194 | EGFR(L747-E749del, A750P) | EGFR     | 10   | 1000 |
| KIN-8194 | EGFR(L747-S752del, P753S) | EGFR     | 83   | 1000 |
| KIN-8194 | EGFR(L747-T751del,Sins)   | EGFR     | 12   | 1000 |
| KIN-8194 | EGFR(L858R)               | EGFR     | 8.9  | 1000 |
| KIN-8194 | EGFR(L858R,T790M)         | EGFR     | 21   | 1000 |
| KIN-8194 | EGFR(L861Q)               | EGFR     | 0.75 | 1000 |
| KIN-8194 | EGFR(S752-I759del)        | EGFR     | 5.2  | 1000 |
| KIN-8194 | EGFR(T790M)               | EGFR     | 0.35 | 1000 |
| KIN-8194 | EIF2AK1                   | EIF2AK1  | 100  | 1000 |
| KIN-8194 | EPHA1                     | EPHA1    | 63   | 1000 |
| KIN-8194 | EPHA2                     | EPHA2    | 100  | 1000 |
| KIN-8194 | EPHA3                     | EPHA3    | 75   | 1000 |
| KIN-8194 | EPHA4                     | EPHA4    | 89   | 1000 |
| KIN-8194 | EPHA5                     | EPHA5    | 100  | 1000 |
| KIN-8194 | EPHA6                     | EPHA6    | 73   | 1000 |
| KIN-8194 | EPHA7                     | EPHA7    | 88   | 1000 |
| KIN-8194 | EPHA8                     | EPHA8    | 48   | 1000 |
| KIN-8194 | EPHB1                     | EPHB1    | 91   | 1000 |
| KIN-8194 | EPHB2                     | EPHB2    | 100  | 1000 |
| KIN-8194 | EPHB3                     | EPHB3    | 82   | 1000 |
| KIN-8194 | EPHB4                     | EPHB4    | 100  | 1000 |
| KIN-8194 | EPHB6                     | EPHB6    | 0    | 1000 |
| KIN-8194 | ERBB2                     | ERBB2    | 0    | 1000 |
| KIN-8194 | ERBB3                     | ERBB3    | 0    | 1000 |
| KIN-8194 | ERBB4                     | ERBB4    | 0.15 | 1000 |
| KIN-8194 | ERK1                      | MAPK3    | 89   | 1000 |
| KIN-8194 | ERK2                      | MAPK1    | 99   | 1000 |
| KIN-8194 | ERK3                      | MAPK6    | 90   | 1000 |
| KIN-8194 | ERK4                      | MAPK4    | 62   | 1000 |
| KIN-8194 | ERK5                      | MAPK7    | 82   | 1000 |
| KIN-8194 | ERK8                      | MAPK15   | 100  | 1000 |
| KIN-8194 | ERN1                      | ERN1     | 47   | 1000 |
| KIN-8194 | FAK                       | PTK2     | 93   | 1000 |
| KIN-8194 | FER                       | FER      | 83   | 1000 |
| KIN-8194 | FES                       | FES      | 98   | 1000 |
| KIN-8194 | FGFR1                     | FGFR1    | 13   | 1000 |
| KIN-8194 | FGFR2                     | FGFR2    | 29   | 1000 |
| KIN-8194 | FGFR3                     | FGFR3    | 36   | 1000 |
| KIN-8194 | FGFR3(G697C)              | FGFR3    | 81   | 1000 |

|          |                              |         |     |      |
|----------|------------------------------|---------|-----|------|
| KIN-8194 | FGFR4                        | FGFR4   | 77  | 1000 |
| KIN-8194 | FGR                          | FGR     | 0   | 1000 |
| KIN-8194 | FLT1                         | FLT1    | 73  | 1000 |
| KIN-8194 | FLT3                         | FLT3    | 3.9 | 1000 |
| KIN-8194 | FLT3(D835H)                  | FLT3    | 8.5 | 1000 |
| KIN-8194 | FLT3(D835V)                  | FLT3    | 0   | 1000 |
| KIN-8194 | FLT3(D835Y)                  | FLT3    | 13  | 1000 |
| KIN-8194 | FLT3(ITD)                    | FLT3    | 9.9 | 1000 |
| KIN-8194 | FLT3(ITD,D835V)              | FLT3    | 31  | 1000 |
| KIN-8194 | FLT3(ITD,F691L)              | FLT3    | 82  | 1000 |
| KIN-8194 | FLT3(K663Q)                  | FLT3    | 7.7 | 1000 |
| KIN-8194 | FLT3(N841I)                  | FLT3    | 0   | 1000 |
| KIN-8194 | FLT3(R834Q)                  | FLT3    | 3   | 1000 |
| KIN-8194 | FLT3-autoinhibited           | FLT3    | 8.8 | 1000 |
| KIN-8194 | FLT4                         | FLT4    | 42  | 1000 |
| KIN-8194 | FRK                          | FRK     | 0   | 1000 |
| KIN-8194 | FYN                          | FYN     | 0   | 1000 |
| KIN-8194 | GAK                          | GAK     | 76  | 1000 |
| KIN-8194 | GCN2(Kin.Dom.2,S808G)        | EIF2AK4 | 80  | 1000 |
| KIN-8194 | GRK1                         | GRK1    | 74  | 1000 |
| KIN-8194 | GRK2                         | ADRBK1  | 93  | 1000 |
| KIN-8194 | GRK3                         | ADRBK2  | 97  | 1000 |
| KIN-8194 | GRK4                         | GRK4    | 67  | 1000 |
| KIN-8194 | GRK7                         | GRK7    | 100 | 1000 |
| KIN-8194 | GSK3A                        | GSK3A   | 91  | 1000 |
| KIN-8194 | GSK3B                        | GSK3B   | 75  | 1000 |
| KIN-8194 | HASPIN                       | GSG2    | 100 | 1000 |
| KIN-8194 | HCK                          | HCK     | 1.3 | 1000 |
| KIN-8194 | HIPK1                        | HIPK1   | 65  | 1000 |
| KIN-8194 | HIPK2                        | HIPK2   | 15  | 1000 |
| KIN-8194 | HIPK3                        | HIPK3   | 91  | 1000 |
| KIN-8194 | HIPK4                        | HIPK4   | 84  | 1000 |
| KIN-8194 | HPK1                         | MAP4K1  | 56  | 1000 |
| KIN-8194 | HUNK                         | HUNK    | 100 | 1000 |
| KIN-8194 | ICK                          | ICK     | 81  | 1000 |
| KIN-8194 | IGF1R                        | IGF1R   | 79  | 1000 |
| KIN-8194 | IKK-alpha                    | CHUK    | 99  | 1000 |
| KIN-8194 | IKK-beta                     | IKBKB   | 100 | 1000 |
| KIN-8194 | IKK-epsilon                  | IKBKE   | 78  | 1000 |
| KIN-8194 | INSR                         | INSR    | 77  | 1000 |
| KIN-8194 | INSRR                        | INSRR   | 65  | 1000 |
| KIN-8194 | IRAK1                        | IRAK1   | 67  | 1000 |
| KIN-8194 | IRAK3                        | IRAK3   | 55  | 1000 |
| KIN-8194 | IRAK4                        | IRAK4   | 75  | 1000 |
| KIN-8194 | ITK                          | ITK     | 16  | 1000 |
| KIN-8194 | JAK1(JH1domain-catalytic)    | JAK1    | 100 | 1000 |
| KIN-8194 | JAK1(JH2domain-pseudokinase) | JAK1    | 82  | 1000 |
| KIN-8194 | JAK2(JH1domain-catalytic)    | JAK2    | 100 | 1000 |
| KIN-8194 | JAK3(JH1domain-catalytic)    | JAK3    | 100 | 1000 |
| KIN-8194 | JNK1                         | MAPK8   | 89  | 1000 |
| KIN-8194 | JNK2                         | MAPK9   | 81  | 1000 |
| KIN-8194 | JNK3                         | MAPK10  | 69  | 1000 |
| KIN-8194 | KIT                          | KIT     | 1.6 | 1000 |
| KIN-8194 | KIT(A829P)                   | KIT     | 8.2 | 1000 |

|          |                   |          |      |      |
|----------|-------------------|----------|------|------|
| KIN-8194 | KIT(D816H)        | KIT      | 45   | 1000 |
| KIN-8194 | KIT(D816V)        | KIT      | 96   | 1000 |
| KIN-8194 | KIT(L576P)        | KIT      | 0.8  | 1000 |
| KIN-8194 | KIT(V559D)        | KIT      | 0.3  | 1000 |
| KIN-8194 | KIT(V559D,T670I)  | KIT      | 82   | 1000 |
| KIN-8194 | KIT(V559D,V654A)  | KIT      | 67   | 1000 |
| KIN-8194 | KIT-autoinhibited | KIT      | 18   | 1000 |
| KIN-8194 | LATS1             | LATS1    | 26   | 1000 |
| KIN-8194 | LATS2             | LATS2    | 0    | 1000 |
| KIN-8194 | LCK               | LCK      | 0.8  | 1000 |
| KIN-8194 | LIMK1             | LIMK1    | 4.8  | 1000 |
| KIN-8194 | LIMK2             | LIMK2    | 56   | 1000 |
| KIN-8194 | LKB1              | STK11    | 100  | 1000 |
| KIN-8194 | LOK               | STK10    | 24   | 1000 |
| KIN-8194 | LRRK2             | LRRK2    | 96   | 1000 |
| KIN-8194 | LRRK2(G2019S)     | LRRK2    | 99   | 1000 |
| KIN-8194 | LTK               | LTK      | 47   | 1000 |
| KIN-8194 | LYN               | LYN      | 2.4  | 1000 |
| KIN-8194 | LZK               | MAP3K13  | 85   | 1000 |
| KIN-8194 | MAK               | MAK      | 95   | 1000 |
| KIN-8194 | MAP3K1            | MAP3K1   | 71   | 1000 |
| KIN-8194 | MAP3K15           | MAP3K15  | 34   | 1000 |
| KIN-8194 | MAP3K2            | MAP3K2   | 0.75 | 1000 |
| KIN-8194 | MAP3K3            | MAP3K3   | 5.9  | 1000 |
| KIN-8194 | MAP3K4            | MAP3K4   | 91   | 1000 |
| KIN-8194 | MAP4K2            | MAP4K2   | 67   | 1000 |
| KIN-8194 | MAP4K3            | MAP4K3   | 16   | 1000 |
| KIN-8194 | MAP4K4            | MAP4K4   | 93   | 1000 |
| KIN-8194 | MAP4K5            | MAP4K5   | 16   | 1000 |
| KIN-8194 | MAPKAPK2          | MAPKAPK2 | 64   | 1000 |
| KIN-8194 | MAPKAPK5          | MAPKAPK5 | 81   | 1000 |
| KIN-8194 | MARK1             | MARK1    | 84   | 1000 |
| KIN-8194 | MARK2             | MARK2    | 84   | 1000 |
| KIN-8194 | MARK3             | MARK3    | 80   | 1000 |
| KIN-8194 | MARK4             | MARK4    | 99   | 1000 |
| KIN-8194 | MAST1             | MAST1    | 49   | 1000 |
| KIN-8194 | MEK1              | MAP2K1   | 0.2  | 1000 |
| KIN-8194 | MEK2              | MAP2K2   | 0.3  | 1000 |
| KIN-8194 | MEK3              | MAP2K3   | 54   | 1000 |
| KIN-8194 | MEK4              | MAP2K4   | 55   | 1000 |
| KIN-8194 | MEK5              | MAP2K5   | 0    | 1000 |
| KIN-8194 | MEK6              | MAP2K6   | 96   | 1000 |
| KIN-8194 | MELK              | MELK     | 36   | 1000 |
| KIN-8194 | MERTK             | MERTK    | 17   | 1000 |
| KIN-8194 | MET               | MET      | 55   | 1000 |
| KIN-8194 | MET(M1250T)       | MET      | 99   | 1000 |
| KIN-8194 | MET(Y1235D)       | MET      | 84   | 1000 |
| KIN-8194 | MINK              | MINK1    | 30   | 1000 |
| KIN-8194 | MKK7              | MAP2K7   | 80   | 1000 |
| KIN-8194 | MKNK1             | MKNK1    | 79   | 1000 |
| KIN-8194 | MKNK2             | MKNK2    | 16   | 1000 |
| KIN-8194 | MLCK              | MYLK3    | 100  | 1000 |
| KIN-8194 | MLK1              | MAP3K9   | 89   | 1000 |
| KIN-8194 | MLK2              | MAP3K10  | 98   | 1000 |

|          |                       |             |     |      |
|----------|-----------------------|-------------|-----|------|
| KIN-8194 | MLK3                  | MAP3K11     | 97  | 1000 |
| KIN-8194 | MRCKA                 | CDC42BPA    | 73  | 1000 |
| KIN-8194 | MRCKB                 | CDC42BPB    | 65  | 1000 |
| KIN-8194 | MST1                  | STK4        | 32  | 1000 |
| KIN-8194 | MST1R                 | MST1R       | 98  | 1000 |
| KIN-8194 | MST2                  | STK3        | 42  | 1000 |
| KIN-8194 | MST3                  | STK24       | 3.1 | 1000 |
| KIN-8194 | MST4                  | MST4        | 2.8 | 1000 |
| KIN-8194 | MTOR                  | MTOR        | 16  | 1000 |
| KIN-8194 | MUSK                  | MUSK        | 88  | 1000 |
| KIN-8194 | MYLK                  | MYLK        | 92  | 1000 |
| KIN-8194 | MYLK2                 | MYLK2       | 98  | 1000 |
| KIN-8194 | MYLK4                 | MYLK4       | 95  | 1000 |
| KIN-8194 | MYO3A                 | MYO3A       | 2   | 1000 |
| KIN-8194 | MYO3B                 | MYO3B       | 31  | 1000 |
| KIN-8194 | NDR1                  | STK38       | 33  | 1000 |
| KIN-8194 | NDR2                  | STK38L      | 66  | 1000 |
| KIN-8194 | NEK1                  | NEK1        | 91  | 1000 |
| KIN-8194 | NEK10                 | NEK10       | 100 | 1000 |
| KIN-8194 | NEK11                 | NEK11       | 75  | 1000 |
| KIN-8194 | NEK2                  | NEK2        | 73  | 1000 |
| KIN-8194 | NEK3                  | NEK3        | 89  | 1000 |
| KIN-8194 | NEK4                  | NEK4        | 82  | 1000 |
| KIN-8194 | NEK5                  | NEK5        | 98  | 1000 |
| KIN-8194 | NEK6                  | NEK6        | 94  | 1000 |
| KIN-8194 | NEK7                  | NEK7        | 91  | 1000 |
| KIN-8194 | NEK9                  | NEK9        | 88  | 1000 |
| KIN-8194 | NIK                   | MAP3K14     | 67  | 1000 |
| KIN-8194 | NIM1                  | MGC42105    | 100 | 1000 |
| KIN-8194 | NLK                   | NLK         | 74  | 1000 |
| KIN-8194 | OSR1                  | OXR1        | 60  | 1000 |
| KIN-8194 | p38-alpha             | MAPK14      | 100 | 1000 |
| KIN-8194 | p38-beta              | MAPK11      | 96  | 1000 |
| KIN-8194 | p38-delta             | MAPK13      | 98  | 1000 |
| KIN-8194 | p38-gamma             | MAPK12      | 96  | 1000 |
| KIN-8194 | PAK1                  | PAK1        | 24  | 1000 |
| KIN-8194 | PAK2                  | PAK2        | 46  | 1000 |
| KIN-8194 | PAK3                  | PAK3        | 41  | 1000 |
| KIN-8194 | PAK4                  | PAK4        | 68  | 1000 |
| KIN-8194 | PAK6                  | PAK6        | 71  | 1000 |
| KIN-8194 | PAK7                  | PAK7        | 52  | 1000 |
| KIN-8194 | PCK1                  | CDK16       | 65  | 1000 |
| KIN-8194 | PCK2                  | CDK17       | 88  | 1000 |
| KIN-8194 | PCK3                  | CDK18       | 88  | 1000 |
| KIN-8194 | PDGFRA                | PDGFRA      | 4.7 | 1000 |
| KIN-8194 | PDGFRB                | PDGFRB      | 0   | 1000 |
| KIN-8194 | PDPK1                 | PDPK1       | 95  | 1000 |
| KIN-8194 | PFCDPK1(P.falciparum) | CDPK1       | 0   | 1000 |
| KIN-8194 | PFPK5(P.falciparum)   | MAL13P1.279 | 92  | 1000 |
| KIN-8194 | PFTAIRE2              | CDK15       | 85  | 1000 |
| KIN-8194 | PFTK1                 | CDK14       | 37  | 1000 |
| KIN-8194 | PHKG1                 | PHKG1       | 100 | 1000 |
| KIN-8194 | PHKG2                 | PHKG2       | 68  | 1000 |
| KIN-8194 | PIK3C2B               | PIK3C2B     | 37  | 1000 |

|          |                      |          |      |      |
|----------|----------------------|----------|------|------|
| KIN-8194 | PIK3C2G              | PIK3C2G  | 100  | 1000 |
| KIN-8194 | PIK3CA               | PIK3CA   | 88   | 1000 |
| KIN-8194 | PIK3CA(C420R)        | PIK3CA   | 81   | 1000 |
| KIN-8194 | PIK3CA(E542K)        | PIK3CA   | 71   | 1000 |
| KIN-8194 | PIK3CA(E545A)        | PIK3CA   | 67   | 1000 |
| KIN-8194 | PIK3CA(E545K)        | PIK3CA   | 54   | 1000 |
| KIN-8194 | PIK3CA(H1047L)       | PIK3CA   | 52   | 1000 |
| KIN-8194 | PIK3CA(H1047Y)       | PIK3CA   | 63   | 1000 |
| KIN-8194 | PIK3CA(I800L)        | PIK3CA   | 40   | 1000 |
| KIN-8194 | PIK3CA(M1043I)       | PIK3CA   | 94   | 1000 |
| KIN-8194 | PIK3CA(Q546K)        | PIK3CA   | 72   | 1000 |
| KIN-8194 | PIK3CB               | PIK3CB   | 20   | 1000 |
| KIN-8194 | PIK3CD               | PIK3CD   | 56   | 1000 |
| KIN-8194 | PIK3CG               | PIK3CG   | 95   | 1000 |
| KIN-8194 | PIK4CB               | PI4KB    | 73   | 1000 |
| KIN-8194 | PIKFYVE              | PIKFYVE  | 70   | 1000 |
| KIN-8194 | PIM1                 | PIM1     | 88   | 1000 |
| KIN-8194 | PIM2                 | PIM2     | 99   | 1000 |
| KIN-8194 | PIM3                 | PIM3     | 69   | 1000 |
| KIN-8194 | PIP5K1A              | PIP5K1A  | 100  | 1000 |
| KIN-8194 | PIP5K1C              | PIP5K1C  | 85   | 1000 |
| KIN-8194 | PIP5K2B              | PIP4K2B  | 74   | 1000 |
| KIN-8194 | PIP5K2C              | PIP4K2C  | 91   | 1000 |
| KIN-8194 | PKAC-alpha           | PRKACA   | 100  | 1000 |
| KIN-8194 | PKAC-beta            | PRKACB   | 88   | 1000 |
| KIN-8194 | PKMYT1               | PKMYT1   | 100  | 1000 |
| KIN-8194 | PKN1                 | PKN1     | 98   | 1000 |
| KIN-8194 | PKN2                 | PKN2     | 92   | 1000 |
| KIN-8194 | PKNB(M.tuberculosis) | pknB     | 62   | 1000 |
| KIN-8194 | PLK1                 | PLK1     | 100  | 1000 |
| KIN-8194 | PLK2                 | PLK2     | 91   | 1000 |
| KIN-8194 | PLK3                 | PLK3     | 93   | 1000 |
| KIN-8194 | PLK4                 | PLK4     | 66   | 1000 |
| KIN-8194 | PRKCD                | PRKCD    | 91   | 1000 |
| KIN-8194 | PRKCE                | PRKCE    | 66   | 1000 |
| KIN-8194 | PRKCH                | PRKCH    | 71   | 1000 |
| KIN-8194 | PRKCI                | PRKCI    | 43   | 1000 |
| KIN-8194 | PRKCQ                | PRKCQ    | 92   | 1000 |
| KIN-8194 | PRKD1                | PRKD1    | 50   | 1000 |
| KIN-8194 | PRKD2                | PRKD2    | 52   | 1000 |
| KIN-8194 | PRKD3                | PRKD3    | 29   | 1000 |
| KIN-8194 | PRKG1                | PRKG1    | 93   | 1000 |
| KIN-8194 | PRKG2                | PRKG2    | 100  | 1000 |
| KIN-8194 | PRKR                 | EIF2AK2  | 90   | 1000 |
| KIN-8194 | PRKX                 | PRKX     | 88   | 1000 |
| KIN-8194 | PRP4                 | PRPF4B   | 91   | 1000 |
| KIN-8194 | PYK2                 | PTK2B    | 91   | 1000 |
| KIN-8194 | QSK                  | KIAA0999 | 85   | 1000 |
| KIN-8194 | RAF1                 | RAF1     | 93   | 1000 |
| KIN-8194 | RET                  | RET      | 0.1  | 1000 |
| KIN-8194 | RET(M918T)           | RET      | 0.35 | 1000 |
| KIN-8194 | RET(V804L)           | RET      | 45   | 1000 |
| KIN-8194 | RET(V804M)           | RET      | 53   | 1000 |
| KIN-8194 | RIOK1                | RIOK1    | 100  | 1000 |

|          |                               |         |      |      |
|----------|-------------------------------|---------|------|------|
| KIN-8194 | RIOK2                         | RIOK2   | 68   | 1000 |
| KIN-8194 | RIOK3                         | RIOK3   | 85   | 1000 |
| KIN-8194 | RIPK1                         | RIPK1   | 99   | 1000 |
| KIN-8194 | RIPK2                         | RIPK2   | 0    | 1000 |
| KIN-8194 | RIPK4                         | RIPK4   | 80   | 1000 |
| KIN-8194 | RIPK5                         | DSTYK   | 13   | 1000 |
| KIN-8194 | ROCK1                         | ROCK1   | 88   | 1000 |
| KIN-8194 | ROCK2                         | ROCK2   | 80   | 1000 |
| KIN-8194 | ROS1                          | ROS1    | 86   | 1000 |
| KIN-8194 | RPS6KA4(Kin.Dom.1-N-terminal) | RPS6KA4 | 51   | 1000 |
| KIN-8194 | RPS6KA4(Kin.Dom.2-C-terminal) | RPS6KA4 | 73   | 1000 |
| KIN-8194 | RPS6KA5(Kin.Dom.1-N-terminal) | RPS6KA5 | 75   | 1000 |
| KIN-8194 | RPS6KA5(Kin.Dom.2-C-terminal) | RPS6KA5 | 92   | 1000 |
| KIN-8194 | RSK1(Kin.Dom.1-N-terminal)    | RPS6KA1 | 49   | 1000 |
| KIN-8194 | RSK1(Kin.Dom.2-C-terminal)    | RPS6KA1 | 75   | 1000 |
| KIN-8194 | RSK2(Kin.Dom.1-N-terminal)    | RPS6KA3 | 26   | 1000 |
| KIN-8194 | RSK2(Kin.Dom.2-C-terminal)    | RPS6KA3 | 91   | 1000 |
| KIN-8194 | RSK3(Kin.Dom.1-N-terminal)    | RPS6KA2 | 41   | 1000 |
| KIN-8194 | RSK3(Kin.Dom.2-C-terminal)    | RPS6KA2 | 2.1  | 1000 |
| KIN-8194 | RSK4(Kin.Dom.1-N-terminal)    | RPS6KA6 | 69   | 1000 |
| KIN-8194 | RSK4(Kin.Dom.2-C-terminal)    | RPS6KA6 | 3.6  | 1000 |
| KIN-8194 | S6K1                          | RPS6KB1 | 29   | 1000 |
| KIN-8194 | SBK1                          | SBK1    | 71   | 1000 |
| KIN-8194 | SGK                           | SGK1    | 100  | 1000 |
| KIN-8194 | SgK110                        | SgK110  | 98   | 1000 |
| KIN-8194 | SGK2                          | SGK2    | 100  | 1000 |
| KIN-8194 | SGK3                          | SGK3    | 52   | 1000 |
| KIN-8194 | SIK                           | SIK1    | 10   | 1000 |
| KIN-8194 | SIK2                          | SIK2    | 43   | 1000 |
| KIN-8194 | SLK                           | SLK     | 66   | 1000 |
| KIN-8194 | SNARK                         | NUAK2   | 18   | 1000 |
| KIN-8194 | SNRK                          | SNRK    | 99   | 1000 |
| KIN-8194 | SRC                           | SRC     | 0.05 | 1000 |
| KIN-8194 | SRMS                          | SRMS    | 0    | 1000 |
| KIN-8194 | SRPK1                         | SRPK1   | 78   | 1000 |
| KIN-8194 | SRPK2                         | SRPK2   | 100  | 1000 |
| KIN-8194 | SRPK3                         | SRPK3   | 74   | 1000 |
| KIN-8194 | STK16                         | STK16   | 80   | 1000 |
| KIN-8194 | STK33                         | STK33   | 33   | 1000 |
| KIN-8194 | STK35                         | STK35   | 6.4  | 1000 |
| KIN-8194 | STK36                         | STK36   | 6.2  | 1000 |
| KIN-8194 | STK39                         | STK39   | 82   | 1000 |
| KIN-8194 | SYK                           | SYK     | 100  | 1000 |
| KIN-8194 | TAK1                          | MAP3K7  | 97   | 1000 |
| KIN-8194 | TAOK1                         | TAOK1   | 88   | 1000 |
| KIN-8194 | TAOK2                         | TAOK2   | 75   | 1000 |
| KIN-8194 | TAOK3                         | TAOK3   | 91   | 1000 |
| KIN-8194 | TBK1                          | TBK1    | 60   | 1000 |
| KIN-8194 | TEC                           | TEC     | 1.9  | 1000 |
| KIN-8194 | TESK1                         | TESK1   | 99   | 1000 |
| KIN-8194 | TGFBR1                        | TGFBR1  | 100  | 1000 |
| KIN-8194 | TGFBR2                        | TGFBR2  | 76   | 1000 |
| KIN-8194 | TIE1                          | TIE1    | 52   | 1000 |
| KIN-8194 | TIE2                          | TEK     | 14   | 1000 |



|          |                              |         |     |      |
|----------|------------------------------|---------|-----|------|
| KIN-8194 | TLK1                         | TLK1    | 95  | 1000 |
| KIN-8194 | TLK2                         | TLK2    | 96  | 1000 |
| KIN-8194 | TNIK                         | TNIK    | 57  | 1000 |
| KIN-8194 | TNK1                         | TNK1    | 97  | 1000 |
| KIN-8194 | TNK2                         | TNK2    | 0.6 | 1000 |
| KIN-8194 | TNNI3K                       | TNNI3K  | 85  | 1000 |
| KIN-8194 | TRKA                         | NTRK1   | 35  | 1000 |
| KIN-8194 | TRKB                         | NTRK2   | 43  | 1000 |
| KIN-8194 | TRKC                         | NTRK3   | 66  | 1000 |
| KIN-8194 | TRPM6                        | TRPM6   | 53  | 1000 |
| KIN-8194 | TSSK1B                       | TSSK1B  | 87  | 1000 |
| KIN-8194 | TSSK3                        | TSSK3   | 100 | 1000 |
| KIN-8194 | TTK                          | TTK     | 32  | 1000 |
| KIN-8194 | TXK                          | TXK     | 11  | 1000 |
| KIN-8194 | TYK2(JH1domain-catalytic)    | TYK2    | 88  | 1000 |
| KIN-8194 | TYK2(JH2domain-pseudokinase) | TYK2    | 87  | 1000 |
| KIN-8194 | TYRO3                        | TYRO3   | 44  | 1000 |
| KIN-8194 | ULK1                         | ULK1    | 65  | 1000 |
| KIN-8194 | ULK2                         | ULK2    | 78  | 1000 |
| KIN-8194 | ULK3                         | ULK3    | 55  | 1000 |
| KIN-8194 | VEGFR2                       | KDR     | 39  | 1000 |
| KIN-8194 | VPS34                        | PIK3C3  | 100 | 1000 |
| KIN-8194 | VRK2                         | VRK2    | 58  | 1000 |
| KIN-8194 | WEE1                         | WEE1    | 100 | 1000 |
| KIN-8194 | WEE2                         | WEE2    | 97  | 1000 |
| KIN-8194 | WNK1                         | WNK1    | 74  | 1000 |
| KIN-8194 | WNK2                         | WNK2    | 71  | 1000 |
| KIN-8194 | WNK3                         | WNK3    | 72  | 1000 |
| KIN-8194 | WNK4                         | WNK4    | 75  | 1000 |
| KIN-8194 | YANK1                        | STK32A  | 17  | 1000 |
| KIN-8194 | YANK2                        | STK32B  | 24  | 1000 |
| KIN-8194 | YANK3                        | STK32C  | 82  | 1000 |
| KIN-8194 | YES                          | YES1    | 0   | 1000 |
| KIN-8194 | YSK1                         | STK25   | 22  | 1000 |
| KIN-8194 | YSK4                         | MAP3K19 | 50  | 1000 |
| KIN-8194 | ZAK                          | ZAK     | 16  | 1000 |
| KIN-8194 | ZAP70                        | ZAP70   | 100 | 1000 |

# Supplementary Table 2

| Kinase         | Reference                          | Sequence                     | Labeling Site         | KIN-8194 | Labeling Site Key                                                                                |
|----------------|------------------------------------|------------------------------|-----------------------|----------|--------------------------------------------------------------------------------------------------|
| HCK            | UniRef100_P08631                   | EGAKFPIKWTAPEAINFGSFTIK      | Activation Loop       | 97.2     | Lys1 Conserved Lysine 1                                                                          |
| LYN            | UniRef100_P07948                   | EGAKFPIKWTAPEAINFGCFTIK      | Activation Loop       | 97.0     | Lys2 Conserved Lysine 2                                                                          |
| HER2/ErbB2     | UniRef100_P04626                   | LLDIDETEHADGGKVPKIK          | Activation Loop       | 96.1     | ATP Loop ATP binding loop,                                                                       |
| CSK            | UniRef100_P41240                   | VSDFLGKTEASSTQDTGKLPVK       | Activation Loop       | 95.9     | Activation Loop Activation loop                                                                  |
| HER2/ErbB2     | UniRef100_P04626                   | GIWIPDGENVKIPVAIKVLR         | Lys1                  | >95      | ATP ATP site in non-canonical kinase (e.g. lipid kinase)                                         |
| ABL, ARG       | UniRef100_P00519, UniRef100_P42684 | LMTGDYTAHAGAKFPIK            | Activation Loop       | 94.4     | Protein Kinase Domain Other lysine within kinase domain, possibly not in ATP binding site        |
| BTK            | UniRef100_Q06187                   | YVLDDEYTSVSGSKFPVR           | Activation Loop       | 94.1     | Other Labeling of residue outside of the protein kinase domain, possibly not in ATP binding site |
| HCK            | UniRef100_P08631                   | VAVKTMKPGSMSVEAFLEAEANVMK    | Lys1                  | 93.5     |                                                                                                  |
| ABL, ARG       | UniRef100_P00519, UniRef100_P42684 | YSLTVAVKTLKEDTMEVEEFLK       | Lys1                  | 90.7     |                                                                                                  |
| BLK            | UniRef100_P51451                   | IIDSEYTAQEGAKFPIK            | Activation Loop       | >90      |                                                                                                  |
| FRK            | UniRef100_P42685                   | HEIKLPVK                     | Activation Loop       | 85.7     |                                                                                                  |
| MAP2K5         | UniRef100_Q13163                   | DVKPSNMLVNTR                 | Lys2                  | 84.5     |                                                                                                  |
| CSK            | UniRef100_P41240                   | VAVKCIK                      | Lys1                  | 83.7     |                                                                                                  |
| ACK            | UniRef100_Q07912                   | KVPFAWCAPESLK                | Activation Loop       | 81.6     |                                                                                                  |
| RIPK3          | UniRef100_Q9Y572                   | DLKPSNVLDPVHVK               | Lys2                  | 66.9     |                                                                                                  |
| DNAPK          | UniRef100_P78527                   | KGGSWIQEINVAEK               | ATP                   | 66.2     |                                                                                                  |
| DNAPK          | UniRef100_P78527                   | EHPFLVKGGEDLR                | ATP                   | 53.7     |                                                                                                  |
| ACK            | UniRef100_Q07912                   | TVSVAVKCLKPDVLSQPEAMDDFIR    | Lys1                  | 51.5     |                                                                                                  |
| LATS1          | UniRef100_Q95835                   | ALYATKTLR                    | Lys1                  | 44.1     |                                                                                                  |
| MST3           | UniRef100_Q9Y6E0                   | DIKAANVLLSEHGEVK             | Lys2                  | 43.4     |                                                                                                  |
| CDK11, CDK8    | UniRef100_P49336, UniRef100_Q9BWU1 | DLKPANILVMGEGPER             | Lys2                  | 39.2     |                                                                                                  |
| CDK10          | UniRef100_Q15131                   | DLKVSNLLMTDK                 | Lys2                  | 34.0     |                                                                                                  |
| MST4, YSK1     | UniRef100_Q00506, UniRef100_Q9P289 | DIKAANVLLSEQGDVK             | Lys2                  | 31.7     |                                                                                                  |
| STLK6          | UniRef100_Q9C0K7                   | HTPTGTLVTIKITNLENCNEER       | Lys1                  | 31.7     |                                                                                                  |
| AMPKa1, AMPKa2 | UniRef100_P54646, UniRef100_Q96E92 | DLKPENVLLDAHMINAK            | Lys2                  | 30.4     |                                                                                                  |
| LATS1          | UniRef100_Q95835                   | DIKPDNILDNR                  | Lys2                  | 29.0     |                                                                                                  |
| IKKe, TBK1     | UniRef100_Q14164, UniRef100_Q9UHD2 | DIKPGNIMR                    | Lys2                  | 28.6     |                                                                                                  |
| MST1, MST2     | UniRef100_Q13188, UniRef100_Q13043 | DIKAGNILLNTEGHAK             | Lys2                  | 27.7     |                                                                                                  |
| AGK            | UniRef100_Q53H12                   | ATVFLNPAACKGK                | ATP                   | 27.0     |                                                                                                  |
| PI4KA, PI4KAP2 | UniRef100_A4QPH2, UniRef100_P42356 | SGTPMQSAAKAPYLAK             | ATP                   | 26.9     |                                                                                                  |
| CDC2           | UniRef100_Q5H9N4                   | TTGQVVAMKK                   | Lys1                  | 24.9     |                                                                                                  |
| p38b           | UniRef100_Q15759                   | QELNKTVWEVPQR                | Other                 | 24.7     |                                                                                                  |
| MAP2K4         | UniRef100_P45985                   | MVHKPSGQIMAVKR               | Lys1                  | 23.8     |                                                                                                  |
| ZAK            | UniRef100_Q9NYL2                   | WISQDKEVAVKK                 | Lys1                  | 21.7     |                                                                                                  |
| PEK            | UniRef100_Q9NZJ5                   | DLKPSNIFTMDDVVK              | Lys2                  | 21.2     |                                                                                                  |
| ATR            | UniRef100_Q13535                   | FYIMMCKPK                    | ATP                   | 20.5     |                                                                                                  |
| PIP4K2C        | UniRef100_Q8TBX8                   | TLVIKESSEDIADHMSNLSNYHQYIVK  | ATP                   | 20.0     |                                                                                                  |
| PITSLRE        | UniRef100_P21127                   | DLKTSNLLSHAGILK              | Lys2                  | 19.8     |                                                                                                  |
| CDK7           | UniRef100_P50613                   | DKNTNQIVAIAIK                | Lys1                  | 19.3     |                                                                                                  |
| ILK            | UniRef100_Q13418                   | ISMADVKFSQCPR                | Protein Kinase Domain | 19.2     |                                                                                                  |
| RAF1           | UniRef100_P04049                   | DMKSNNIFLHEGLTVK             | Lys2                  | 19.1     |                                                                                                  |
| p70S6Kb        | UniRef100_Q9UBS0                   | IYAMKVLR                     | Lys1                  | 17.9     |                                                                                                  |
| LOK            | UniRef100_Q94804                   | DLKAGNVLMTEGDIR              | Lys2                  | 17.1     |                                                                                                  |
| MAP3K1         | UniRef100_Q13233                   | DVKGANLLIDSTGQR              | Lys2                  | 17.1     |                                                                                                  |
| GCK            | UniRef100_Q12851, UniRef100_P35557 | DIKGANLLTLQGDVK              | Lys2                  | 16.7     |                                                                                                  |
| LYN            | UniRef100_P07948                   | VAVKTLKPGTMSVQAFLEENLMK      | Lys1                  | 14.8     |                                                                                                  |
| PIK3CD         | UniRef100_Q00329                   | VNWLAHNVSKDNRQ               | ATP                   | 14.6     |                                                                                                  |
| AurB           | UniRef100_Q96GD4                   | SHFIVALKVLFK                 | Lys1                  | 14.5     |                                                                                                  |
| SGK            | UniRef100_Q00141                   | HKAEEVFPYAVKVLQK             | Lys1                  | 14.0     |                                                                                                  |
| HPK1           | UniRef100_Q92918                   | DKVSGDLVALKMVK               | Lys1                  | 13.9     |                                                                                                  |
| MAP3K5         | UniRef100_Q99683                   | DIKGDVNLINTYSGVLK            | Lys2                  | 13.8     |                                                                                                  |
| MAP2K6         | UniRef100_P52564, UniRef100_L5KNH7 | HVPSGQIMAVKR                 | Lys1                  | 13.5     |                                                                                                  |
| NDR2           | UniRef100_Q9Y2H1                   | DTGHIYAMKILR                 | Lys1                  | 13.4     |                                                                                                  |
| PKN1           | UniRef100_Q16512                   | VLLSEFRPSGELFAIKALK          | Lys1                  | 13.0     |                                                                                                  |
| Erk2           | UniRef100_P28482                   | DLKPSNLLNTTCDLK              | Lys2                  | 12.7     |                                                                                                  |
| MAST1, MAST2   | UniRef100_Q6P0Q8, UniRef100_Q9Y2H9 | DLKPDNLLITSMGHIK             | Lys2                  | 12.5     |                                                                                                  |
| FER            | UniRef100_P16591                   | QEDGGVYSSSLGKQPIK            | Activation Loop       | 11.5     |                                                                                                  |
| CASK           | UniRef100_Q14936                   | ETGQQFAVKIVDVAK              | Lys1                  | 11.3     |                                                                                                  |
| JAK1 domain1   | UniRef100_P23458                   | QLASALSYLEDKDLVHGNVCTKNLLLAR | Activation Loop       | 11.3     |                                                                                                  |
| PKN1           | UniRef100_Q16512                   | DLKLDNLLDTEGYVK              | Lys2                  | 11.3     |                                                                                                  |
| PKCd           | UniRef100_Q05655                   | KPTMYPEWK                    | Other                 | 11.2     |                                                                                                  |
| NDR2           | UniRef100_Q9Y2H1                   | DIKPDNLLDPAK                 | Lys2                  | 11.1     |                                                                                                  |

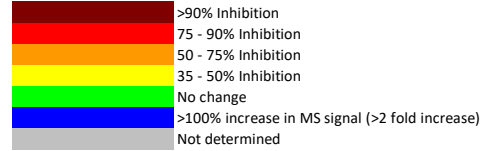

|                       |                                         |                                   |                       |      |
|-----------------------|-----------------------------------------|-----------------------------------|-----------------------|------|
| STK33                 | UniRef100_Q9BYT3                        | DLKLENIMVK                        | Lys2                  | 10.9 |
| PIK3CB                | UniRef100_P42338                        | VFGEDSVGVIFKNGDDLRLQDMLTLQMLR     | ATP                   | 10.7 |
| AMPKa1, AMPKa2        | UniRef100_P54646, UniRef100_Q96E92      | VAVKILNR                          | Lys1                  | 10.2 |
| STLK5                 | UniRef100_Q7RTN6                        | SVKASHILISVDGK                    | Lys2                  | 10.1 |
| FAM20B                | UniRef100_O75063                        | ETEPACADGDIMEGSVTLWLPDVWPLQKHR    | ATP                   | 10.0 |
| ARAF                  | UniRef100_P10398                        | DLKSNIFLHEGLTVK                   | Lys2                  | 9.9  |
| PIK3C3                | UniRef100_Q8NEB9                        | TEDGGKYPVIFKHGDDLRLQDQLILQIISLMDK | ATP                   | 9.9  |
| CaMKK2                | UniRef100_Q96RR4                        | LAYNENDNTYYAMKVLK                 | Lys1                  | 9.6  |
| NEK4                  | UniRef100_P51957                        | DLKTQNVFLTR                       | Lys2                  | 9.5  |
| AurA, AurB, AurC      | UniRef100_Q14965, UniRef100_Q9UQB9, Un  | GKFGNVYLAR                        | ATP Loop              | 9.4  |
| CaMK2g                | UniRef100_Q13555                        | TSTQEYAAKIINTK                    | Lys1                  | 9.4  |
| MLK3                  | UniRef100_Q16584                        | DLKSNILLQPIESDDMEHK               | Lys2                  | 9.2  |
| MSK2 domain1          | UniRef100_Q75676                        | LYAMKVLAR                         | Lys1                  | 9.0  |
| Erk1                  | UniRef100_P27361                        | DLKPSNLLINTTCDLK                  | Lys2                  | 8.5  |
| HPK1                  | UniRef100_Q92918                        | DIKGANILLINDAGEVR                 | Lys2                  | 7.7  |
| CaMK2a, CaMK2b, CaMI  | UniRef100_Q53H78, UniRef100_Q13557, Un  | DLKPENLLLASK                      | Lys2                  | 7.2  |
| p38a                  | UniRef100_Q16539                        | QELNKTIWEVPER                     | Other                 | 7.1  |
| TAO1, TAO3            | UniRef100_Q9H2K8, UniRef100_Q7L7X3      | DIKAGNILLTEPGQVK                  | Lys2                  | 7.0  |
| AurA                  | UniRef100_Q14965                        | FILALKVLFK                        | Lys1                  | 6.9  |
| LRRK2                 | UniRef100_Q55007                        | DLKPHNVLLFTLYPNAIIAK              | Lys2                  | 6.8  |
| TLK1                  | UniRef100_Q9UKI8                        | YAAVKIHQLNK                       | Lys1                  | 6.8  |
| MAP4K5                | UniRef100_Q9Y4K4                        | DIKGANILLTDHGDVK                  | Lys2                  | 6.5  |
| PIK3C3                | UniRef100_Q8NEB9                        | TEDGGKYPVIFKHGDDLRL               | ATP                   | 6.3  |
| p70S6Kb               | UniRef100_Q9UBS0                        | DLKPENIMLSSQGHK                   | Lys2                  | 6.1  |
| JAK3 domain2          | UniRef100_P52333                        | LLPLDKDYVVVR                      | Activation Loop       | 6.1  |
| NDR1, NDR2            | UniRef100_Q9Y2H1, UniRef100_Q15208      | LSDFGLCTGLKK                      | Activation Loop       | 6.1  |
| CDK9                  | UniRef100_P50750                        | IGQGTGFEVFKAR                     | ATP Loop              | 6.0  |
| CDK4                  | UniRef100_P11802                        | DLKPENILVTSGGTVK                  | Lys2                  | 5.8  |
| MAPKAPK2, MAPKAPK3    | UniRef100_Q16644, UniRef100_P49137      | DVKPENLLYTSK                      | Lys2                  | 5.7  |
| SLK                   | UniRef100_Q9H2G2                        | DLKAGNIFTLDDGDIK                  | Lys2                  | 5.5  |
| PDK1                  | UniRef100_Q15530                        | EYAIKILEK                         | Lys1                  | 5.2  |
| IRAK3                 | UniRef100_Q9Y616                        | SHLEHQSQCTINMTSSSKHLWYMPEEYIR     | Protein Kinase Domain | 4.9  |
| MAP2K6                | UniRef100_P52564, UniRef100_L5KNH7      | DVKPSNVLINALGQVK                  | Lys2                  | 4.9  |
| JAK3 domain2          | UniRef100_P52333                        | YDPLGDNTGALVAVKQLQHSGPDQQR        | Lys1                  | 4.9  |
| NEK3                  | UniRef100_P51956                        | SKNIFLTQNGK                       | Activation Loop       | 4.7  |
| MAP2K3                | UniRef100_P46734                        | HAQSGTIMAVKR                      | Lys1                  | 4.6  |
| MARK2, MARK3          | UniRef100_P27448, UniRef100_Q7KZ17      | DLKAENLLLDADMNIK                  | Lys2                  | 4.6  |
| MAP3K4                | UniRef100_Q9Y6R4                        | DIKGANIFLTSSGLIK                  | Lys2                  | 4.4  |
| HRI                   | UniRef100_Q98QI3                        | IGDFGLACTDILQKNTDWTNR             | Activation Loop       | 4.1  |
| GSK3A                 | UniRef100_P49840                        | DIKPONLLVDPDTAVLK                 | Lys2                  | 4.0  |
| NEK9                  | UniRef100_Q8TD19                        | RTEDDSLVLVWKEVDLTR                | Lys1                  | 3.9  |
| p38d, p38g            | UniRef100_Q15264, UniRef100_P53778      | DLKPGNLAVNEDCELK                  | Lys2                  | 3.6  |
| JAK2 domain2          | UniRef100_Q60674                        | IGDFGLTKVLPQDKEYYK                | Activation Loop       | 3.6  |
| p38a                  | UniRef100_Q16539                        | DLKPSNLAVNEDCELK                  | Lys2                  | 3.6  |
| P14KB                 | UniRef100_Q9UBF8                        | LLSVIVKCGDDLRLQELLAFAQVLK         | ATP                   | 3.3  |
| TAO2                  | UniRef100_Q9UL54                        | DVKAGNILLSEPLVK                   | Lys2                  | 3.2  |
| JAK3 domain2          | UniRef100_P52333                        | IADFGLAKLLPLDKDYVVVR              | Activation Loop       | 3.2  |
| PAN3                  | UniRef100_Q58A45                        | VMDPTKILITGK                      | ATP                   | 2.7  |
| RSK3 domain1          | UniRef100_Q15349                        | DLKPENILLDEEGHIKITDFGLSK          | Lys2                  | 2.6  |
| NDR1                  | UniRef100_Q15208                        | DTGHVYAMKILR                      | Lys1                  | 2.3  |
| CaMK2d                | UniRef100_Q13557                        | IPTGOEYAAKIINTKK                  | Lys1                  | 2.2  |
| TBK1                  | UniRef100_Q9UHD2                        | TGDLFAIKVFNNISFLRPVDVQMR          | Lys1                  | 1.9  |
| RSK2 domain1          | UniRef100_P51812                        | QLYAMKVLK                         | Lys1                  | 1.8  |
| CaMKK1                | UniRef100_Q8N5S9                        | DIKPSNLLLGDDGHVK                  | Lys2                  | 1.8  |
| RSK1 domain1, RSK2 do | UniRef100_Q15418, UniRef100_P51812, Uni | DLKPENILLDEEGHIK                  | Lys2                  | 1.0  |
| CDK6                  | UniRef100_Q00534                        | DLKPQNILVTSSGQIK                  | Lys2                  | 0.9  |
| CK1g1, CK1g2, CK1g3   | UniRef100_Q9Y6M4, UniRef100_P78368, Un  | KIGCGNFGELR                       | ATP Loop              | 0.7  |
| TLK1                  | UniRef100_Q9UKI8                        | YLNEIKPPIHYDLKPGNILLVDGTACGEIK    | Lys2                  | 0.4  |
| Wnk1, Wnk2, Wnk3      | UniRef100_Q9Y3S1, UniRef100_Q9BYP7, Uni | DLKCDNIFITGPTGSVK                 | Lys2                  | 0.4  |
| GSK3B                 | UniRef100_P49841                        | DIKPONLLLDPTAVLK                  | Lys2                  | 0.0  |
| IKKa                  | UniRef100_Q15111                        | DLKPENIVLQDVGGK                   | Lys2                  | -0.4 |
| ULK3                  | UniRef100_D3DW67                        | EVVAIKCVAK                        | Lys1                  | -0.8 |
| IRE1                  | UniRef100_Q75460                        | DLKPHNILISMVNAHGK                 | Lys2                  | -1.4 |

|                        |                                                      |                                  |                       |       |
|------------------------|------------------------------------------------------|----------------------------------|-----------------------|-------|
| IRAK4                  | UniRef100_Q9NWZ3                                     | GYVNTTVAVKK                      | Lys1                  | -1.5  |
| CDK9                   | UniRef100_P50750                                     | DMKAANVLTR                       | Lys2                  | -1.6  |
| IRAK4                  | UniRef100_Q9NWZ3                                     | DIKSANILLDEAFTAK                 | Lys2                  | -1.9  |
| NDR1                   | UniRef100_Q15208                                     | DIKPDNLLLDISK                    | Lys2                  | -2.0  |
| CDK2                   | UniRef100_P24941                                     | LTGEVVALKK                       | Lys1                  | -2.1  |
| NEK8                   | UniRef100_Q865G6                                     | DLKTQNILDK                       | Lys2                  | -2.5  |
| PIP4K2C                | UniRef100_Q8TBX8                                     | VKELPTLKDMDFLNK                  | ATP                   | -2.6  |
| CaMK4                  | UniRef100_Q16566                                     | DLKPENLLYATPAPDAPLK              | Lys2                  | -2.6  |
| ULK1                   | UniRef100_Q75385                                     | DLKPQNILLSNPAGR                  | Lys2                  | -2.9  |
| MAP3K4                 | UniRef100_Q9Y6R4                                     | VYTCISVDTGELMAMKEIR              | Lys1                  | -3.0  |
| PKCa, PKCg             | UniRef100_P17252, UniRef100_P05129                   | NLIPMDPNGLSDPYVVKLK              | Other                 | -3.1  |
| CDK2                   | UniRef100_P24941                                     | DLKPQNLLINTEGAIK                 | Lys2                  | -3.2  |
| RSK2 domain1           | UniRef100_P51812                                     | LTFDGLSKESIDHEKK                 | Activation Loop       | -3.4  |
| LKB1                   | UniRef100_Q15831                                     | DIKPGNLLLTGGTLK                  | Lys2                  | -3.4  |
| CDK7                   | UniRef100_P50613                                     | DLKPNLLLDENGVLK                  | Lys2                  | -3.4  |
| LOK                    | UniRef100_Q94804                                     | NKETGALAAKVIETK                  | Lys1                  | -3.6  |
| CDC2                   | UniRef100_Q5H9N4                                     | DLKPQNLLIDDK                     | Lys2                  | -3.7  |
| TLK2                   | UniRef100_Q86UE8                                     | YLNEIKPPIHYDLKPGNILLVNGTACGEIK   | Lys2                  | -3.7  |
| PFTAIRE2               | UniRef100_Q96Q40                                     | DLKPQNLLISHLGELK                 | Lys2                  | -5.1  |
| STLK5                  | UniRef100_Q7RTN6                                     | YSVKVLPWLSPEVLQQNLQGYDAK         | Activation Loop       | -5.3  |
| CaMK1a                 | UniRef100_Q14012                                     | LVAIKCIAK                        | Lys1                  | -5.5  |
| MAP2K3                 | UniRef100_P46734                                     | DVKPSNVLINK                      | Lys2                  | -5.6  |
| PFTAIRE1               | UniRef100_Q94921                                     | DLKPQNLLISDTGELK                 | Lys2                  | -5.7  |
| eEF2K                  | UniRef100_Q00418                                     | YIKYNSNSGFVR                     | ATP                   | -5.7  |
| MARK4                  | UniRef100_Q96L34                                     | DLKAENLLLDAAEAIK                 | Lys2                  | -5.8  |
| p70S6K                 | UniRef100_P23443                                     | DLKPENIMLNHQGHVK                 | Lys2                  | -6.0  |
| NLK                    | UniRef100_Q9UBE8                                     | DIKPGNLLVNSNCVLK                 | Lys2                  | -6.1  |
| CLK3                   | UniRef100_P49761                                     | YEIVGNLGEFTGKVVVECLDHAR          | ATP Loop              | -6.2  |
| NEK9                   | UniRef100_Q8TD19                                     | LG DYGLAKK                       | Activation Loop       | -6.4  |
| DGKA                   | UniRef100_P23743                                     | IDPVPNTHPLLVFVNPKSGGK            | ATP                   | -6.7  |
| AurA                   | UniRef100_Q14965                                     | DIKPENLLGSAGELK                  | Lys2                  | -7.1  |
| PIP5K3                 | UniRef100_Q9Y2I7                                     | GGKSGAAFYATEDDRFILK              | ATP                   | -7.4  |
| MLKL                   | UniRef100_Q8NB16                                     | APVAIKVFK                        | Lys1                  | -7.8  |
| JNK1, JNK2, JNK3       | UniRef100_P45983, UniRef100_P53779, UniRef100_P53779 | DLKPSNIVVK                       | Lys2                  | -8.0  |
| MST1                   | UniRef100_Q13043                                     | ETGQVIAIKQVPVESDLQEIIK           | Lys1                  | -8.4  |
| CaMKK2                 | UniRef100_Q96RR4                                     | DIKPSNLLVGEDGHIK                 | Lys2                  | -8.5  |
| IKKe                   | UniRef100_Q14164                                     | SGELVAVKVFNTTSLRPR               | Lys1                  | -8.6  |
| TLK2                   | UniRef100_Q86UE8                                     | YVAVKIHQLNK                      | Lys1                  | -8.7  |
| MAST3                  | UniRef100_Q60307                                     | DLKPDNLLITSLGHIK                 | Lys2                  | -8.7  |
| MSK2 domain1           | UniRef100_Q75676                                     | DLKLENVLLDSEGHVLTDFGLSK          | Lys2                  | -8.8  |
| MLK4                   | UniRef100_Q5TCX8                                     | DLKSSNILLLEK                     | Lys2                  | -8.8  |
| MSK1 domain1           | UniRef100_Q75582                                     | DIKLENILLDSNGHVLTDFGLSK          | Lys2                  | -9.0  |
| CK2a1                  | UniRef100_P68400                                     | GGPNIITLADIVKDPVSR               | Protein Kinase Domain | -9.2  |
| MAP3K2                 | UniRef100_Q9Y2U5                                     | ELAVKQVQFDPDPSPETSKEVNALECEIQLLK | Lys1                  | -9.9  |
| MAP2K1, MAP2K2         | UniRef100_P36507, UniRef100_Q02750                   | DVKPSNVLNSR                      | Lys2                  | -10.0 |
| MAP2K7                 | UniRef100_Q14733                                     | DVKPSNILLDER                     | Lys2                  | -10.3 |
| ZC1/HGK, ZC2/TNIK, ZC3 | UniRef100_Q95819, UniRef100_Q9UKE5, UniRef100_Q9UKE5 | DIKGQNVLLTENAIEVK                | Lys2                  | -10.5 |
| RSK1 domain1           | UniRef100_Q15418                                     | LTFDGLSKEAIDHEKK                 | Activation Loop       | -10.5 |
| MARK4                  | UniRef100_Q96L34                                     | EVAIKIIDKTQLNPSSLQK              | Lys1                  | -10.7 |
| GCN2 domain2           | UniRef100_Q9P2K8                                     | LDGCCYAVKR                       | Lys1                  | -10.8 |
| MASTL                  | UniRef100_Q96GX5                                     | LYAVKVVVK                        | Lys1                  | -11.2 |
| CaMK1d                 | UniRef100_Q8IU85                                     | DLKPENLLYYSQDEESK                | Lys2                  | -11.2 |
| PIP4K2B                | UniRef100_P78356                                     | AKDLPTFKDNDFLNEGQK               | ATP                   | -11.5 |
| MST2                   | UniRef100_Q13188                                     | ESGQVVAIKQVPVESDLQEIIK           | Lys1                  | -11.7 |
| CaMK1d                 | UniRef100_Q8IU85                                     | LFVAVKCIPIK                      | Lys1                  | -11.8 |
| PI4KB                  | UniRef100_Q9UBF8                                     | VPHQTQAVVLSNSKDK                 | ATP                   | -12.2 |
| GCK                    | UniRef100_Q12851, UniRef100_P35557                   | DTVTSLEAAVKIVK                   | Lys1                  | -12.2 |
| ILK                    | UniRef100_Q13418                                     | WQGNDIVVKVLK                     | Lys1                  | -12.6 |
| PKR                    | UniRef100_P19525                                     | DLKPSNIFLVDTK                    | Lys2                  | -12.8 |
| MARK3, MARK4           | UniRef100_Q96L34, UniRef100_P27448                   | EVAIKIIDK                        | Lys1                  | -13.2 |
| MAP4K5                 | UniRef100_Q9Y4K4                                     | NVHTGELAAVKIHK                   | Lys1                  | -13.4 |
| MAPKAPK3               | UniRef100_Q16644                                     | QVLGLGVNGKVLCEFHRR               | ATP Loop              | -13.8 |
| ROCK1                  | UniRef100_Q13464                                     | KLQLELNQER                       | Other                 | -14.1 |

|                      |                                          |                                |                 |       |
|----------------------|------------------------------------------|--------------------------------|-----------------|-------|
| KSR1, KSR2           | UniRef100_Q6VAB6, UniRef100_Q8IVT5       | SKNVFYDNGK                     | Activation Loop | -14.3 |
| FRAP                 | UniRef100_P42345                         | IQSIAPSLQVITSKQRPR             | ATP             | -15.3 |
| NEK9                 | UniRef100_Q8TD19                         | DIKTLNIFLTK                    | Lys2            | -15.6 |
| SGK3                 | UniRef100_Q96BR1                         | FYAVKVLQK                      | Lys1            | -16.3 |
| AKT1                 | UniRef100_P31749                         | GTFGKVLVK                      | ATP Loop        | -16.4 |
| PCTAIRE1             | UniRef100_Q00536                         | SKLTDNLVALKEIR                 | Lys1            | -16.4 |
| IKKb                 | UniRef100_Q14920                         | DLKPENVLQQQEQQR                | Lys2            | -16.9 |
| SMG1                 | UniRef100_Q96Q15                         | DTVTIHSVGGTITILPTKTKPK         | ATP             | -17.1 |
| PIK3CG               | UniRef100_P48736                         | KKPLWLEFK                      | ATP             | -17.2 |
| PLK1                 | UniRef100_P53350                         | DLKLGNLFLNEDLEVK               | Lys2            | -17.2 |
| MAP3K2, MAP3K3       | UniRef100_Q9Y2U5, UniRef100_Q99759       | DIKGANILR                      | Lys2            | -17.6 |
| MST3, MST4, YSK1     | UniRef100_Q00506, UniRef100_Q9P289, Uni  | LADFGVAGQLTDTQIKR              | Activation Loop | -17.6 |
| MARK2                | UniRef100_Q7KZI7                         | EVAVKIIDKTLNSSLQK              | Lys1            | -18.4 |
| BRAF                 | UniRef100_P15056                         | DLKSNIFLHEDLTVK                | Lys2            | -18.5 |
| FER                  | UniRef100_P16591                         | TSVAVKTCKEDLPQELK              | Lys1            | -18.6 |
| Erk5                 | UniRef100_Q13164                         | DLKPSNLLVNNENCELK              | Lys2            | -18.8 |
| NEK1                 | UniRef100_Q96PY6                         | DIKSNIFLTK                     | Lys2            | -19.1 |
| PCTAIRE1, PCTAIRE3   | UniRef100_Q00536, UniRef100_Q07002       | DLKPQNLLINER                   | Lys2            | -19.2 |
| SMG1                 | UniRef100_Q96Q15                         | SYPLYFKGLEDLHLDER              | ATP             | -19.5 |
| PFTAIRE1             | UniRef100_Q94921                         | LVALKVR                        | Lys1            | -19.6 |
| TAK1                 | UniRef100_Q43318                         | DLKPPNLLLAVGGTVLK              | Lys2            | -19.8 |
| Wnk1, Wnk2           | UniRef100_Q9Y3S1, UniRef100_Q9H4A3       | GSFKTVYK                       | ATP Loop        | -20.1 |
| FES                  | UniRef100_P07332                         | LRADNTLVAVKSCR                 | Lys1            | -20.2 |
| NEK7                 | UniRef100_Q8TDX7                         | AACLLDGVPVALKK                 | Lys1            | -21.0 |
| CHK2                 | UniRef100_Q96017                         | VAIKIISK                       | Lys1            | -21.2 |
| SNRK                 | UniRef100_Q9NRH2                         | DLKPENVVFFEK                   | Lys2            | -21.2 |
| MSK1 domain1, MSK2 d | UniRef100_Q75676, UniRef100_Q75582       | VLGTGAYGKVFLVR                 | ATP Loop        | -21.2 |
| IRAK1                | UniRef100_P51617                         | AIQFLHQDPSLIHGDIKSSNVLLDER     | Lys2            | -21.4 |
| JAK1 domain2         | UniRef100_P23458                         | IGDFGLTKAIETDKEYYTVK           | Activation Loop | -21.5 |
| SYK                  | UniRef100_P43405                         | ISDFGLSKALR                    | Activation Loop | -21.6 |
| PKD3                 | UniRef100_Q94806                         | NIVHCDLKPENVLLASAEPFPQVK       | Lys2            | -22.2 |
| PLK1                 | UniRef100_P53350                         | CFEISDADTKEVFAGKIVPK           | Lys1            | -23.1 |
| RSK2 domain2         | UniRef100_P51812                         | DLKPSNLYVDESGNPESIR            | Lys2            | -25.0 |
| MELK                 | UniRef100_Q14680                         | DLKPENLLFDEYHK                 | Lys2            | -25.4 |
| PKR                  | UniRef100_P19525                         | IGDFGLVTSKNDGKR                | Activation Loop | -25.8 |
| MAP2K4               | UniRef100_P45985                         | DIKPSNILLDR                    | Lys2            | -26.2 |
| CDK5                 | UniRef100_Q00535                         | NRETHEIVALKR                   | Lys1            | -26.4 |
| NuaK2                | UniRef100_Q9H093                         | LVAIKSIR                       | Lys1            | -26.6 |
| MAP3K15, MAP3K5, MA  | UniRef100_Q99683, UniRef100_Q95382, Uni  | IAIKEIPER                      | Lys1            | -27.7 |
| MARK3                | UniRef100_P27448                         | EVAIKIIDKTLNPTSLQK             | Lys1            | -28.6 |
| BARK1                | UniRef100_P25098                         | DLKPANILLDEHGHVR               | Lys2            | -28.7 |
| CDK5                 | UniRef100_Q00535                         | DLKPQNLLINR                    | Lys2            | -29.2 |
| PIP4K2A              | UniRef100_P48426                         | AKELPTLKDNDFFINEGQK            | ATP             | -30.1 |
| DGKH                 | UniRef100_Q86XP1                         | ATFSFCVSPLLVFNKSGDNQGVK        | ATP             | -31.5 |
| CHK2                 | UniRef100_Q96017                         | DLKPENVLLSQEEDCLIK             | Lys2            | -33.0 |
| GCN2 domain2         | UniRef100_Q9P2K8                         | DLKPVNIFLSDDDHVK               | Lys2            | -33.6 |
| Wnk1, Wnk2, Wnk4     | UniRef100_Q9Y3S1, UniRef100_Q96J92, Unif | IGDLGLATLKR                    | Activation Loop | -33.9 |
| SIK                  | UniRef100_P57059                         | TQVAIKIIDK                     | Lys1            | -35.2 |
| MYO3A, MYO3B         | UniRef100_Q8NEV4, UniRef100_Q8WXR4       | DVKGNILLTTEGGVK                | Lys2            | -36.7 |
| PCTAIRE2, PCTAIRE3   | UniRef100_Q00537, UniRef100_Q07002       | SKLTENLVALKEIR                 | Lys1            | -38.0 |
| RSK1 domain2         | UniRef100_Q15418                         | DLKPSNLYVDESGNPECLR            | Lys2            | -41.3 |
| PAK2                 | UniRef100_Q13177                         | IGQGASGTVFTATDVALGQEVAIKQINLQK | Lys1            | -41.5 |
| JAK1 domain2         | UniRef100_P23458                         | YDPEGDNTGEQVAVKSLKPESGGNHADLKK | Lys1            | -41.8 |
| AKT1, AKT3           | UniRef100_P31749, UniRef100_Q9Y243       | DLKLENLMLDKDGHK                | Lys2            | -42.4 |
| SYK                  | UniRef100_P43405                         | TVAVKILK                       | Lys1            | -44.3 |
| MAP4K3               | UniRef100_Q8IVH8                         | DIKGANILLTDNGHVK               | Lys2            | -50.6 |

| <b>EC50 (M)</b>               | <b>KIN-8194</b> | <b>Ibrutinib</b> |
|-------------------------------|-----------------|------------------|
| BCWM.1                        | 4.83E-09        | 6.81E-07         |
| MWCL-1                        | 6.64E-09        | 7.79E-07         |
| TMD8                          | 5.41E-09        | 4.06E-09         |
| HBL-1                         | 7.09E-08        | 2.58E-08         |
| OCI-Ly7                       | 1.07E-07        | 1.75E-06         |
| OCI-Ly19                      | 8.26E-07        | 9.25E-06         |
| Ramos                         | 8.72E-06        | 5.07E-06         |
| RPMI-8226                     | 1.17E-04        | 1.45E-05         |
| BCWM.1 - Vector               | 1.69E-08        | 1.12E-06         |
| BCWM.1 - HCK <sup>WT</sup>    | 8.87E-08        | 6.33E-07         |
| BCWM.1 - HCK <sup>T333M</sup> | 2.02E-06        | 1.42E-05         |
| MWCL-1 - Vector               | 1.12E-09        | 2.95E-06         |
| MWCL-1 - HCK <sup>WT</sup>    | 3.86E-09        | 9.82E-07         |
| MWCL-1 - HCK <sup>T333M</sup> | 8.13E-07        | 4.00E-06         |
| BCWM.1 - Vector               | 2.32E-08        | 5.73E-07         |
| BCWM.1 - BTK <sup>WT</sup>    | 2.50E-08        | 4.43E-07         |
| BCWM.1 - BTK <sup>C481S</sup> | 4.01E-08        | 2.21E-06         |
| TMD8 - Vector                 | 1.27E-08        | 1.48E-09         |
| TMD8 - BTK <sup>WT</sup>      | 1.59E-08        | 4.10E-09         |
| TMD8 - BTK <sup>C481S</sup>   | 1.46E-08        | 7.17E-07         |
